# Supplementary material for: Chemical Constituents from Ficus sagittifolia Stem Bark and Their Antimicrobial Activities
Source: MDPI journal article supplement (doi:10.3390/plants12152801), 2023-07-28
Supplement: s1 [file s1]

*Supplementary Material*

## **Chemical constituents from *Ficus sagittifolia* stem bark and their antimicrobial activities**

**Olayombo M. Taiwo<sup>1,2\*</sup>, Olaoluwa O. Olaoluwa<sup>1</sup>, Olapeju O. Aiyelaagbe<sup>1</sup> and Thomas J. Schmidt<sup>2,\*</sup>**

<sup>1</sup>Department of Chemistry, University of Ibadan, Ibadan, 200284, Nigeria; tolayombo@gmail.com (O.M.T.);  
omosalewa.olaoluwa@gmail.com (O.O.O.); oaiyelaagbe@gmail.com (O.O.A.)

<sup>2</sup>Institute of Pharmaceutical Biology and Phytochemistry (IPBP), University of Muenster, PharmaCampus, Correnstrasse 48,  
D-48149, Germany; thomschm@uni-muenster.de (T.J.S.); tolayombo@gmail.com (O.M.T.)

\*Correspondence: thomschm@uni-muenster.de (T.J.S.); tolayombo@gmail.com (O.M.T.)

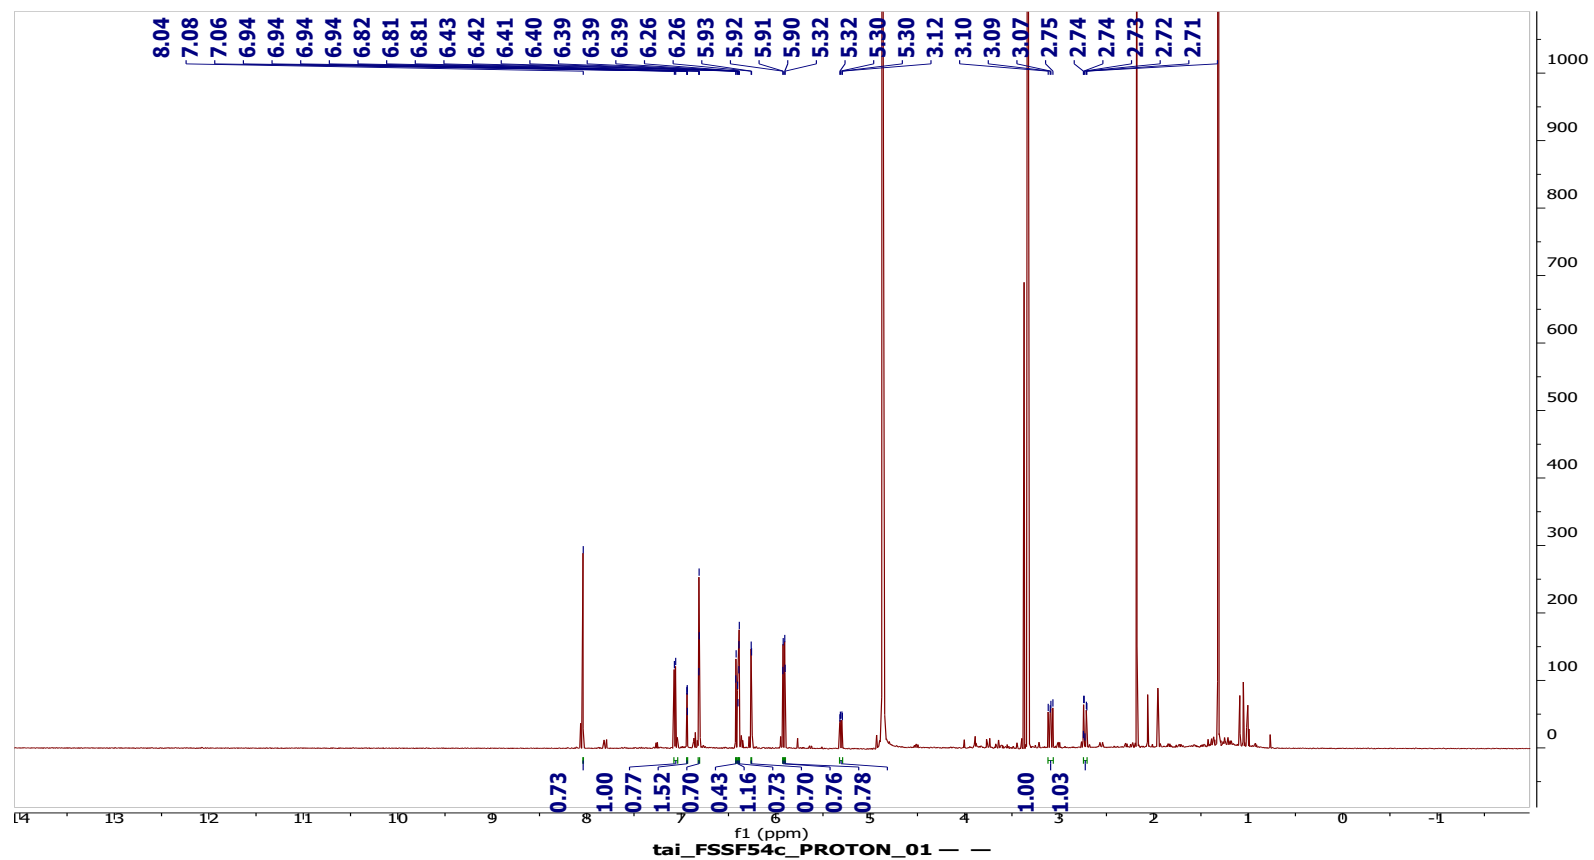

**Figure S-1.**  $^1\text{H}$ -NMR spectrum of compounds **1** and **2** (600 MHz,  $\text{CD}_3\text{OD}$ )

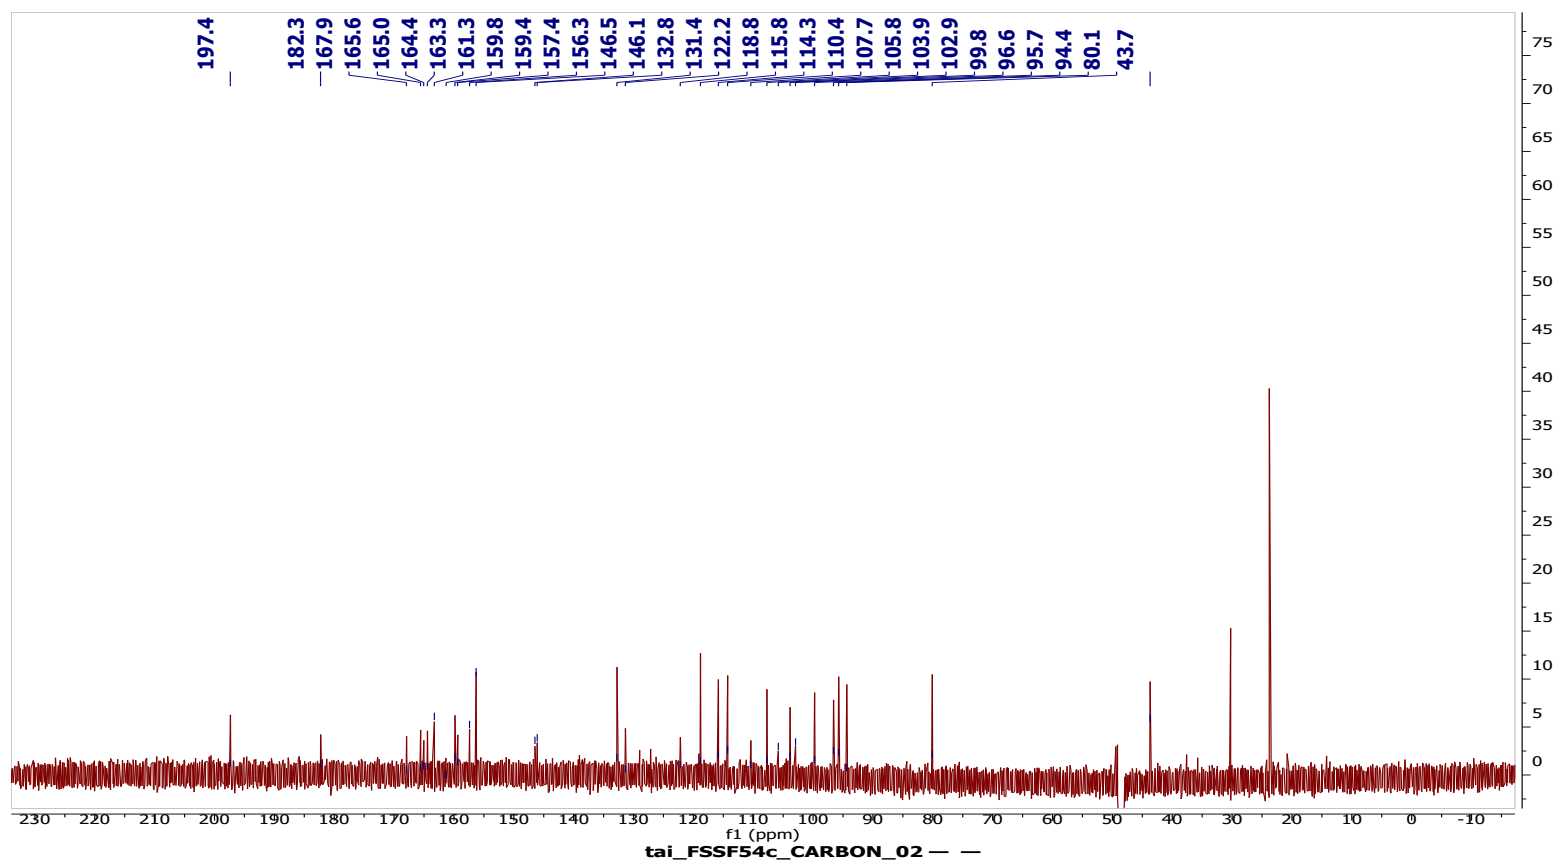

**Figure S-2.** <sup>13</sup>C-NMR spectrum of compounds 1 and 2 (150 MHz, CD<sub>3</sub>OD)

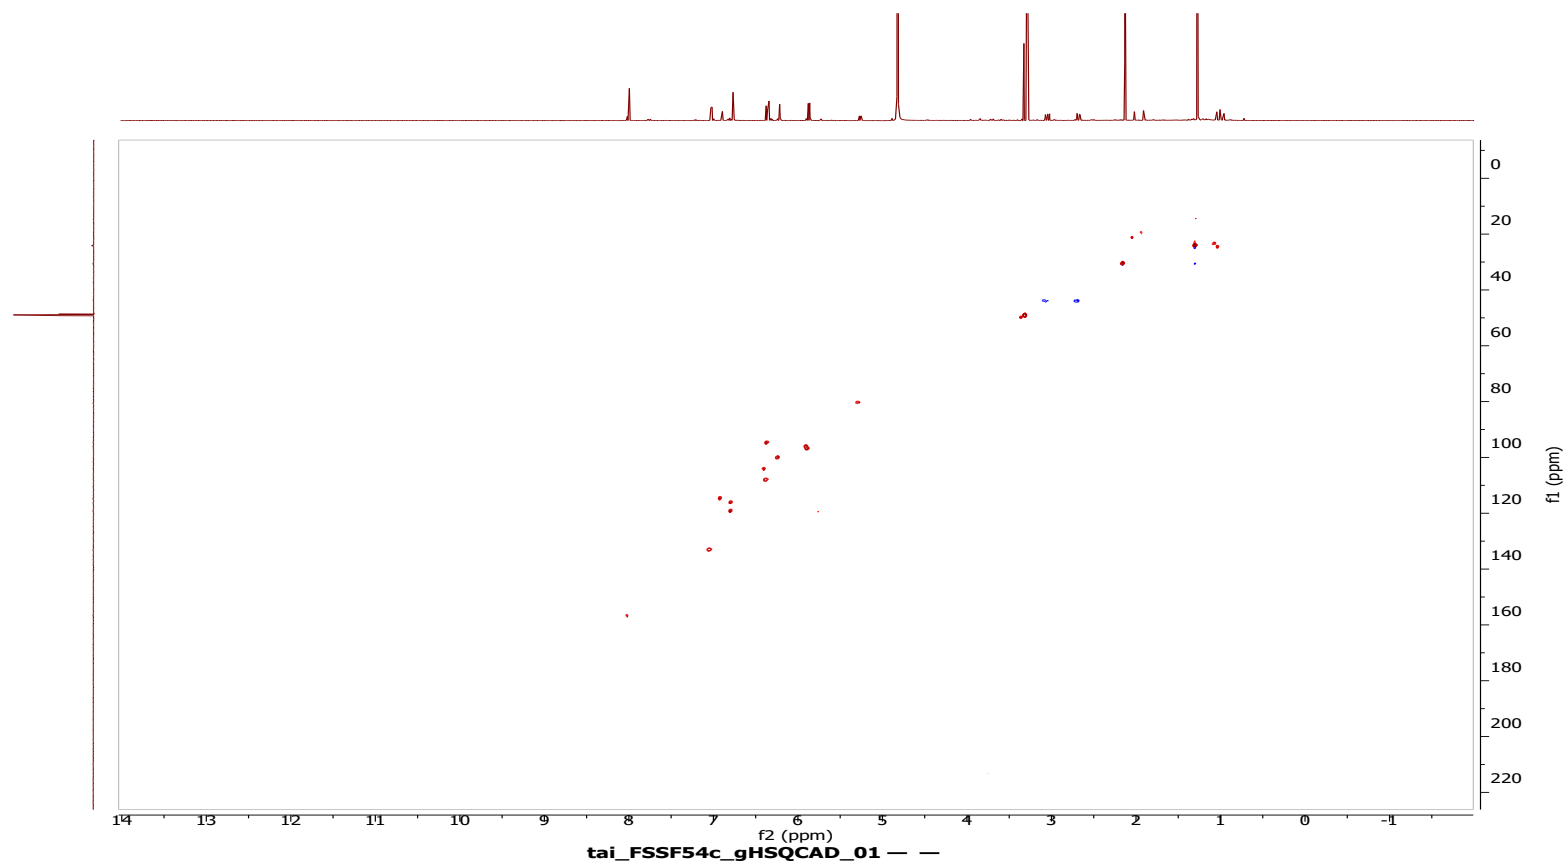

**Figure S-3.** HSQC spectrum of compounds 1 and 2

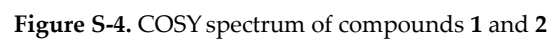

**Figure S-4.** COSY spectrum of compounds **1** and **2**

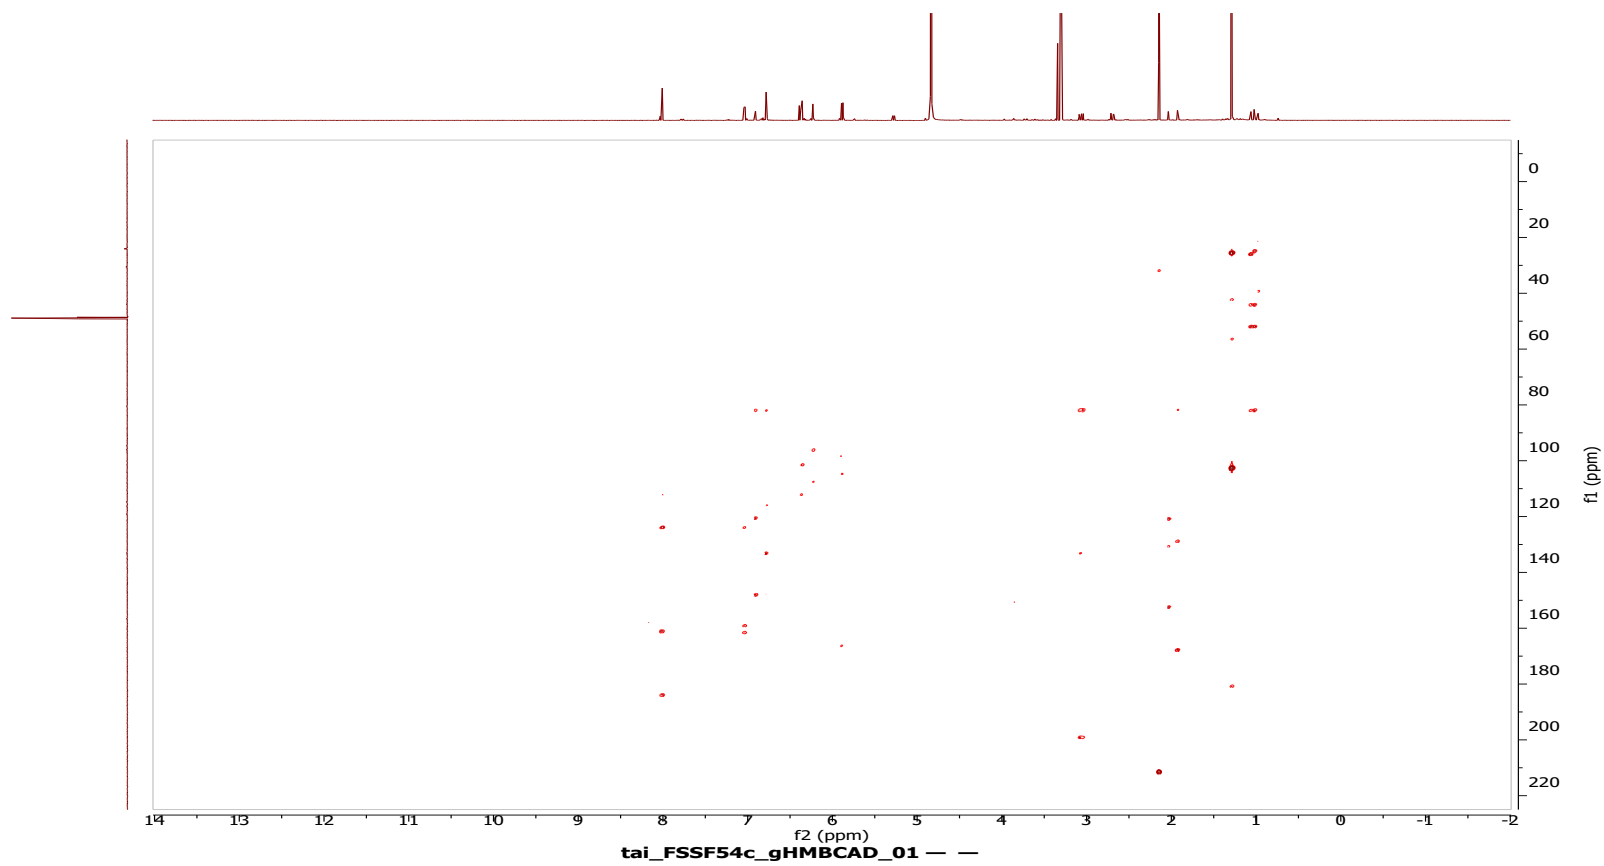

Figure S-5. HMBC spectrum of compounds 1 and 2

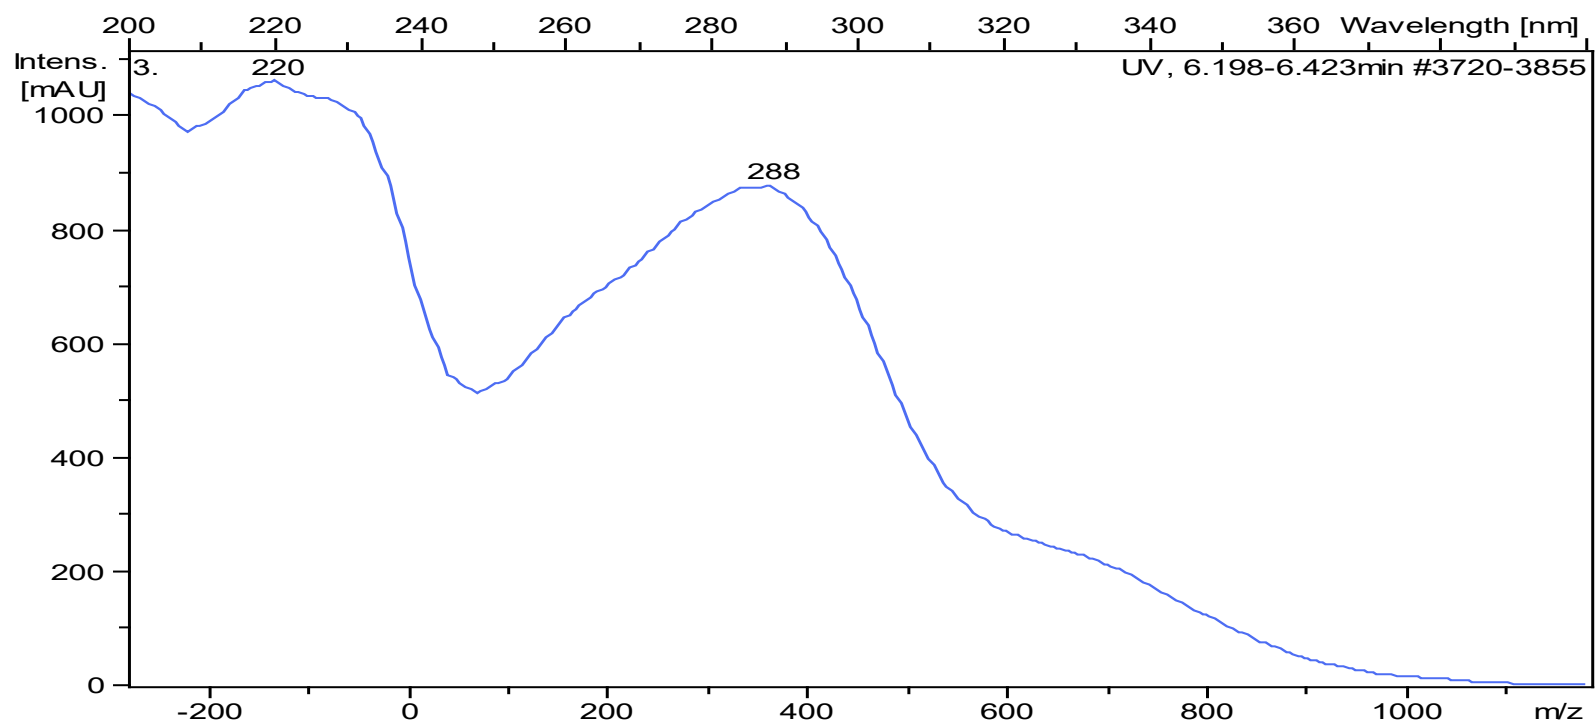

Figure S-6. LC-UV spectrum of compound 1

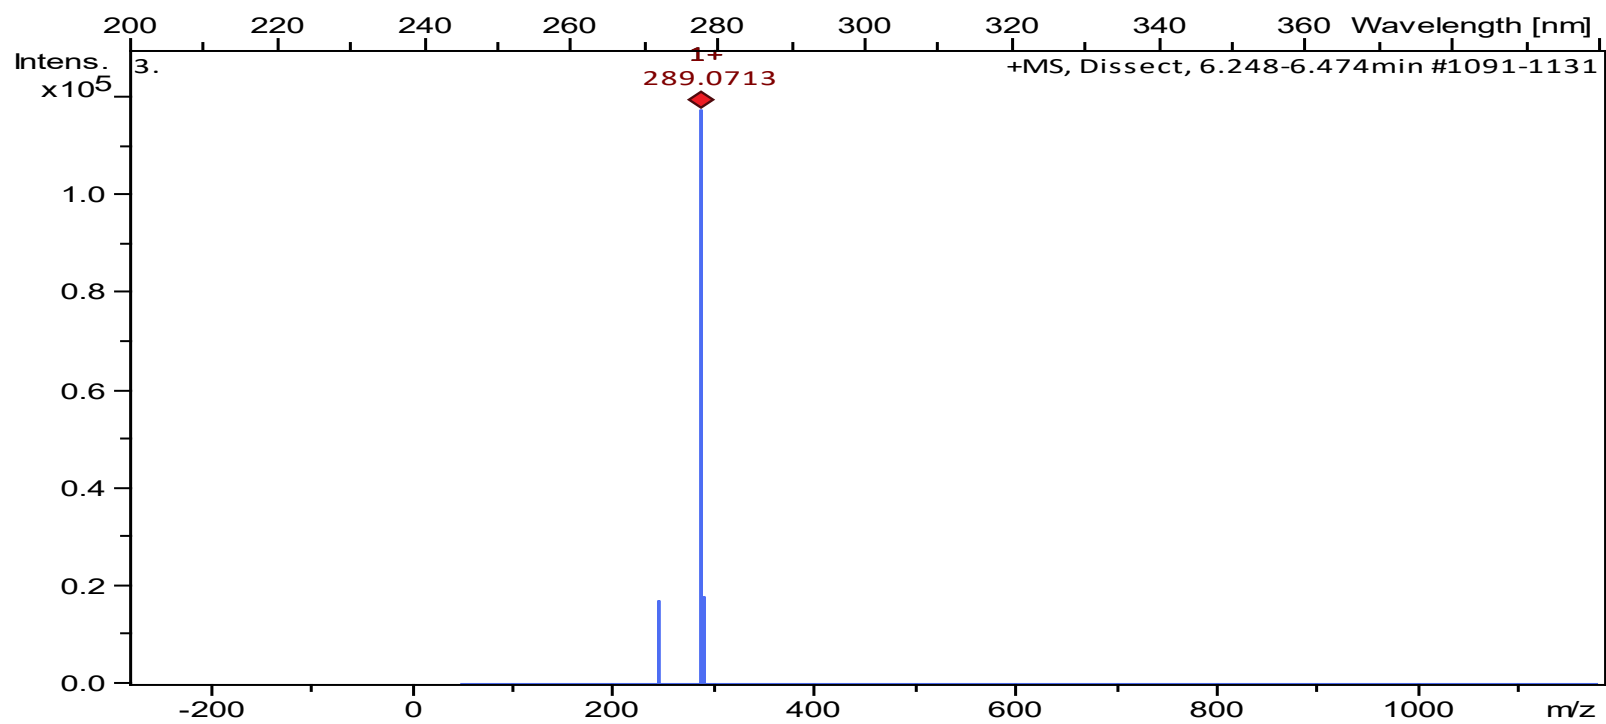

Figure S-7. HR-ESIMS spectrum of compound 1



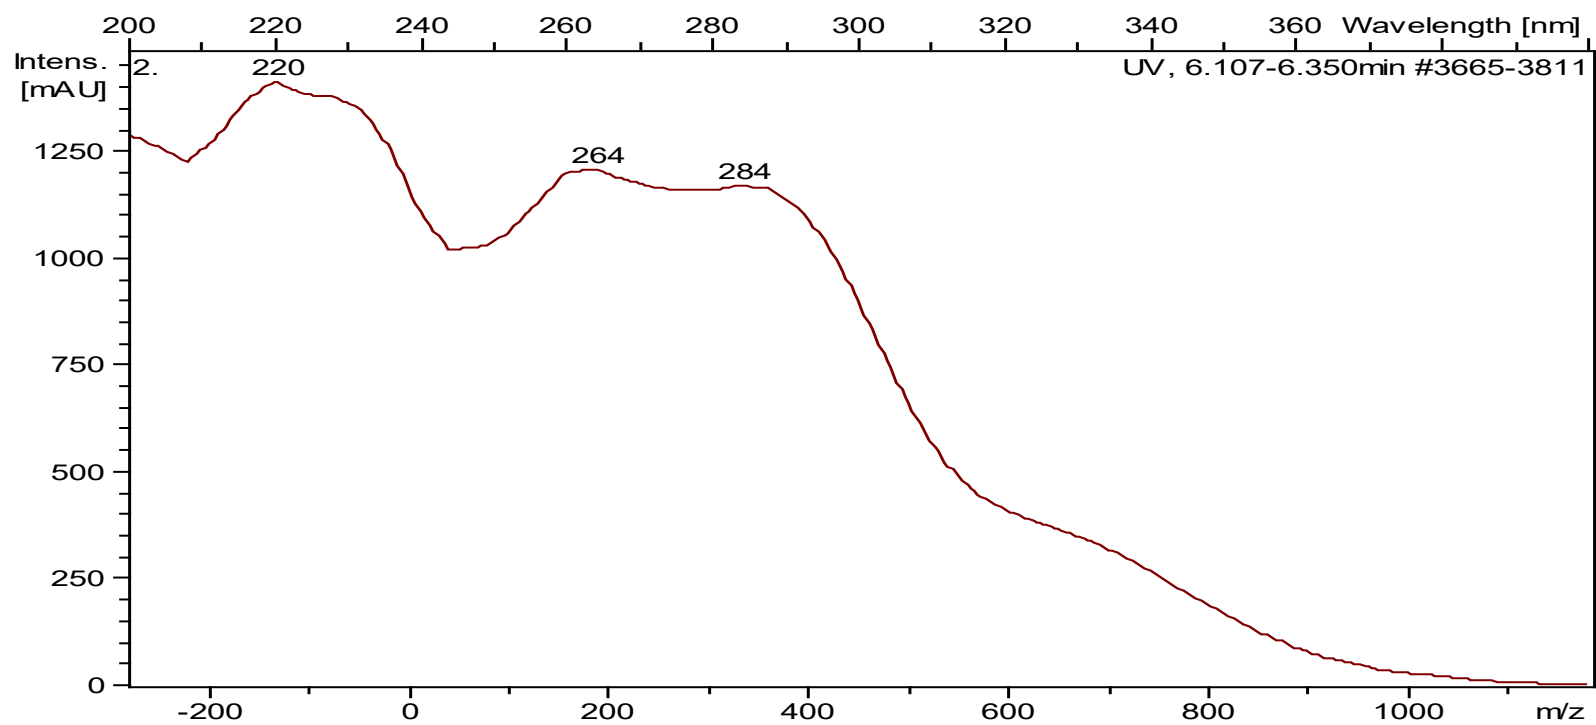

Figure S-8. LC-UV spectrum of compound 2

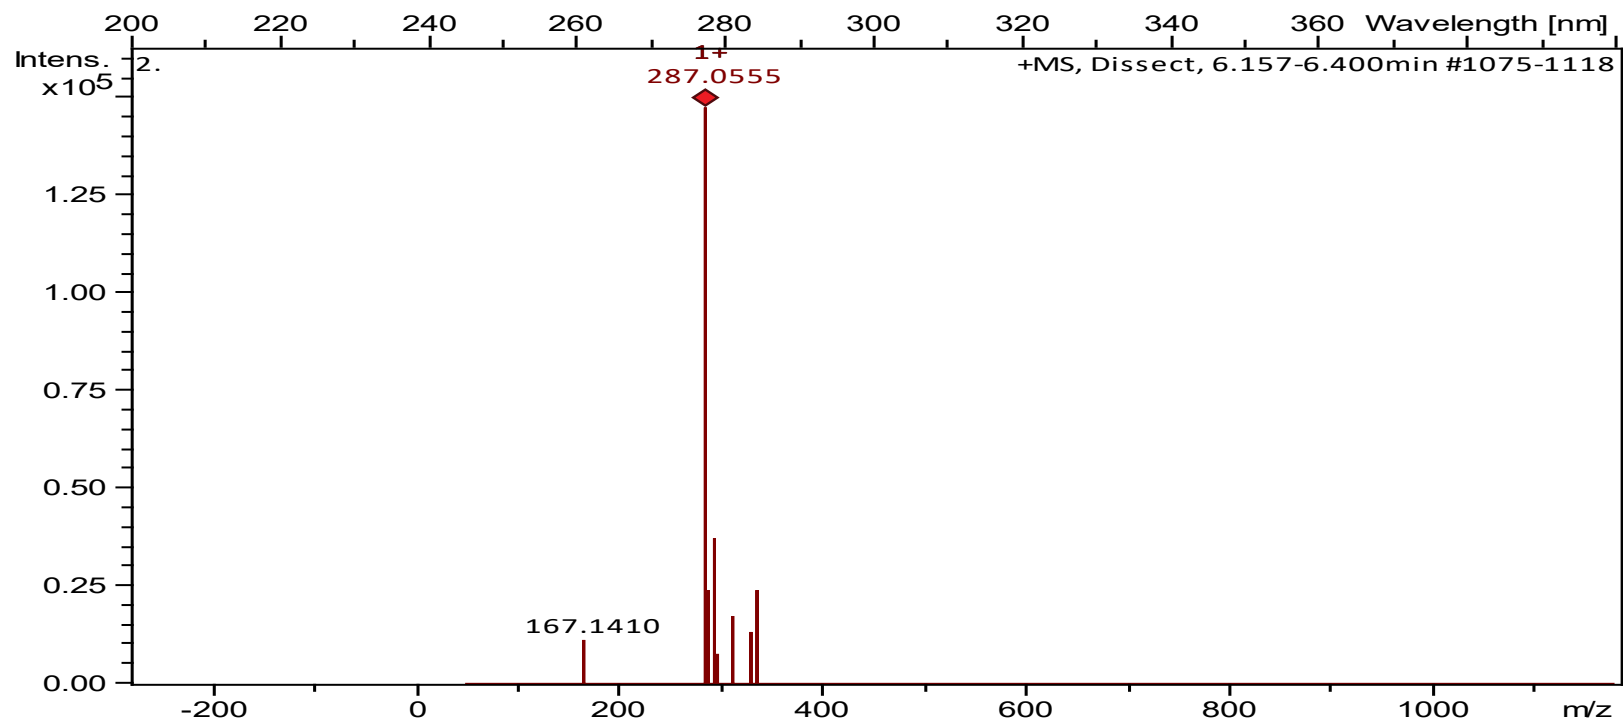

Figure S-9. HR-ESIMS spectrum of compound 2

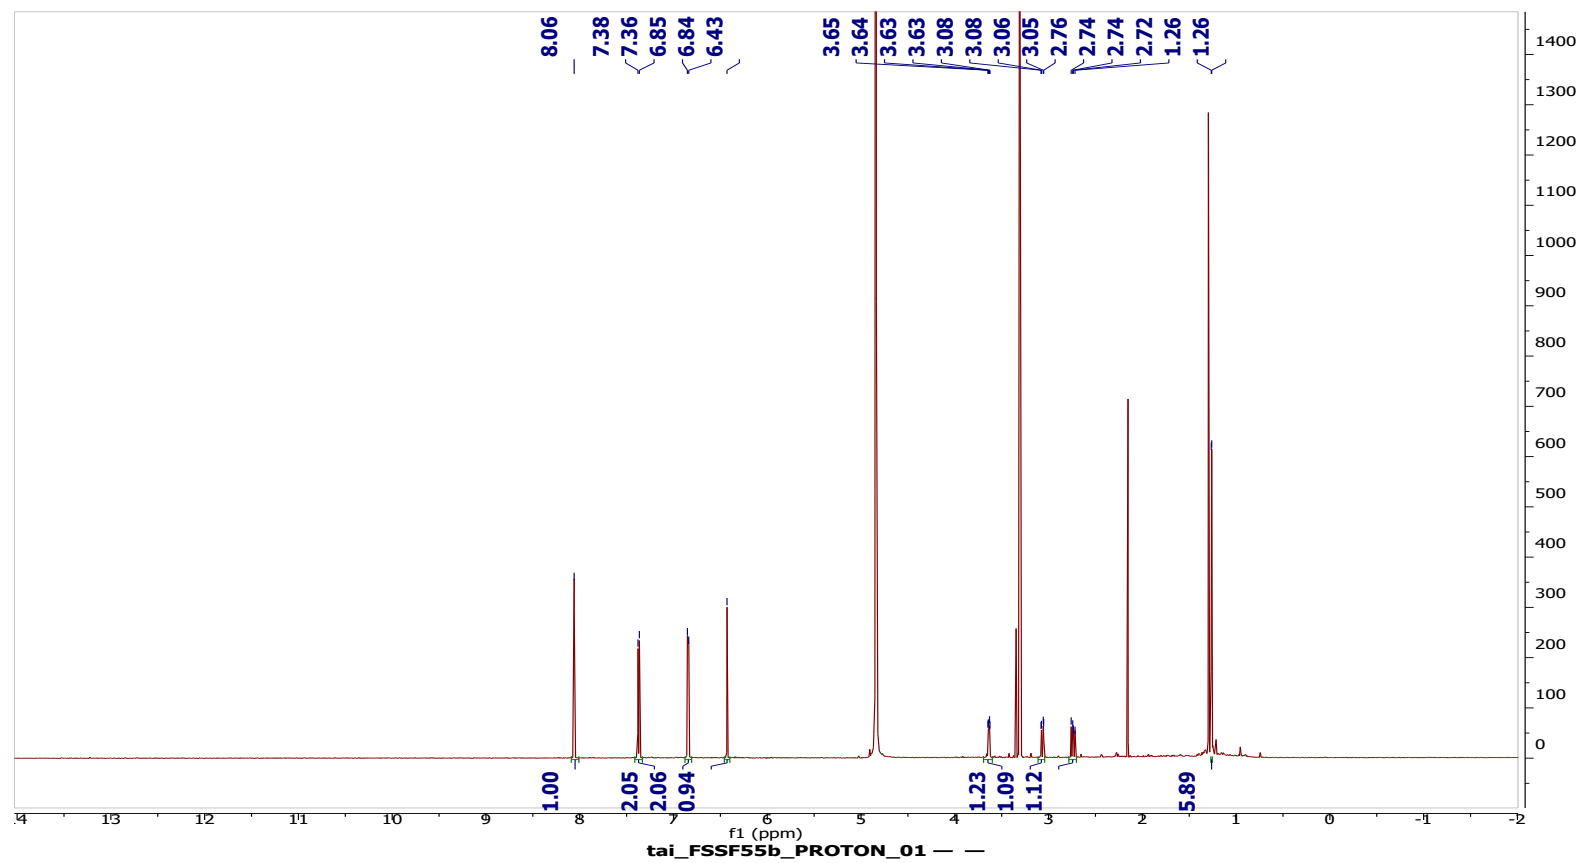

**Figure S-10.**  $^1\text{H}$ -NMR spectrum of compound **3** (600 MHz,  $\text{CD}_3\text{OD}$ )

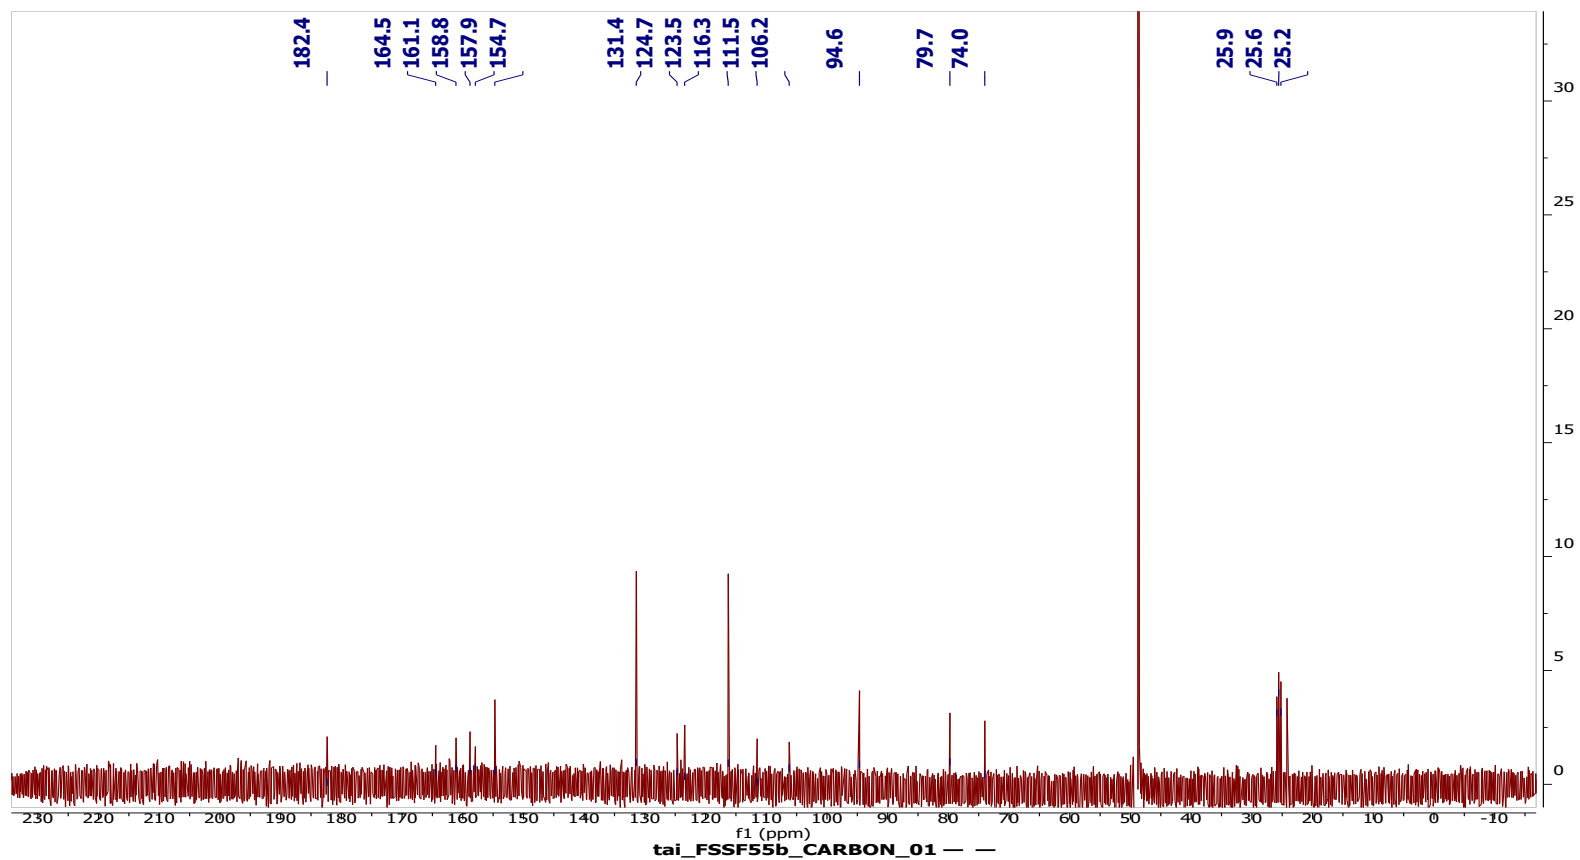

**Figure S-11.**  $^{13}\text{C}$ -NMR spectrum of compound 3 (150 MHz,  $\text{CD}_3\text{OD}$ )

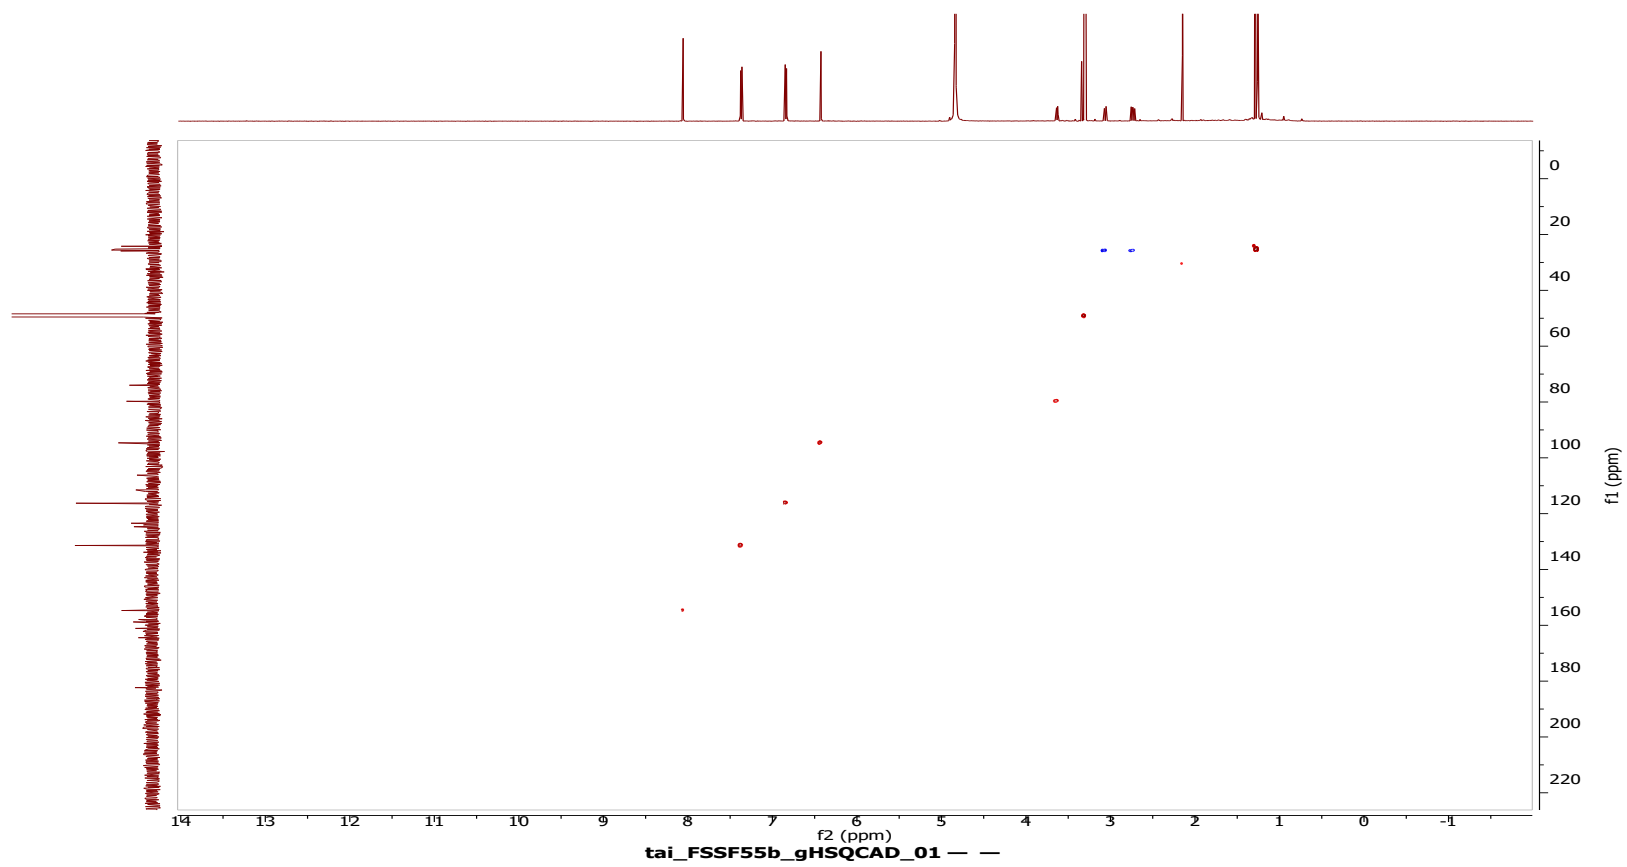

Figure S-12. HSQC spectrum of compound 3

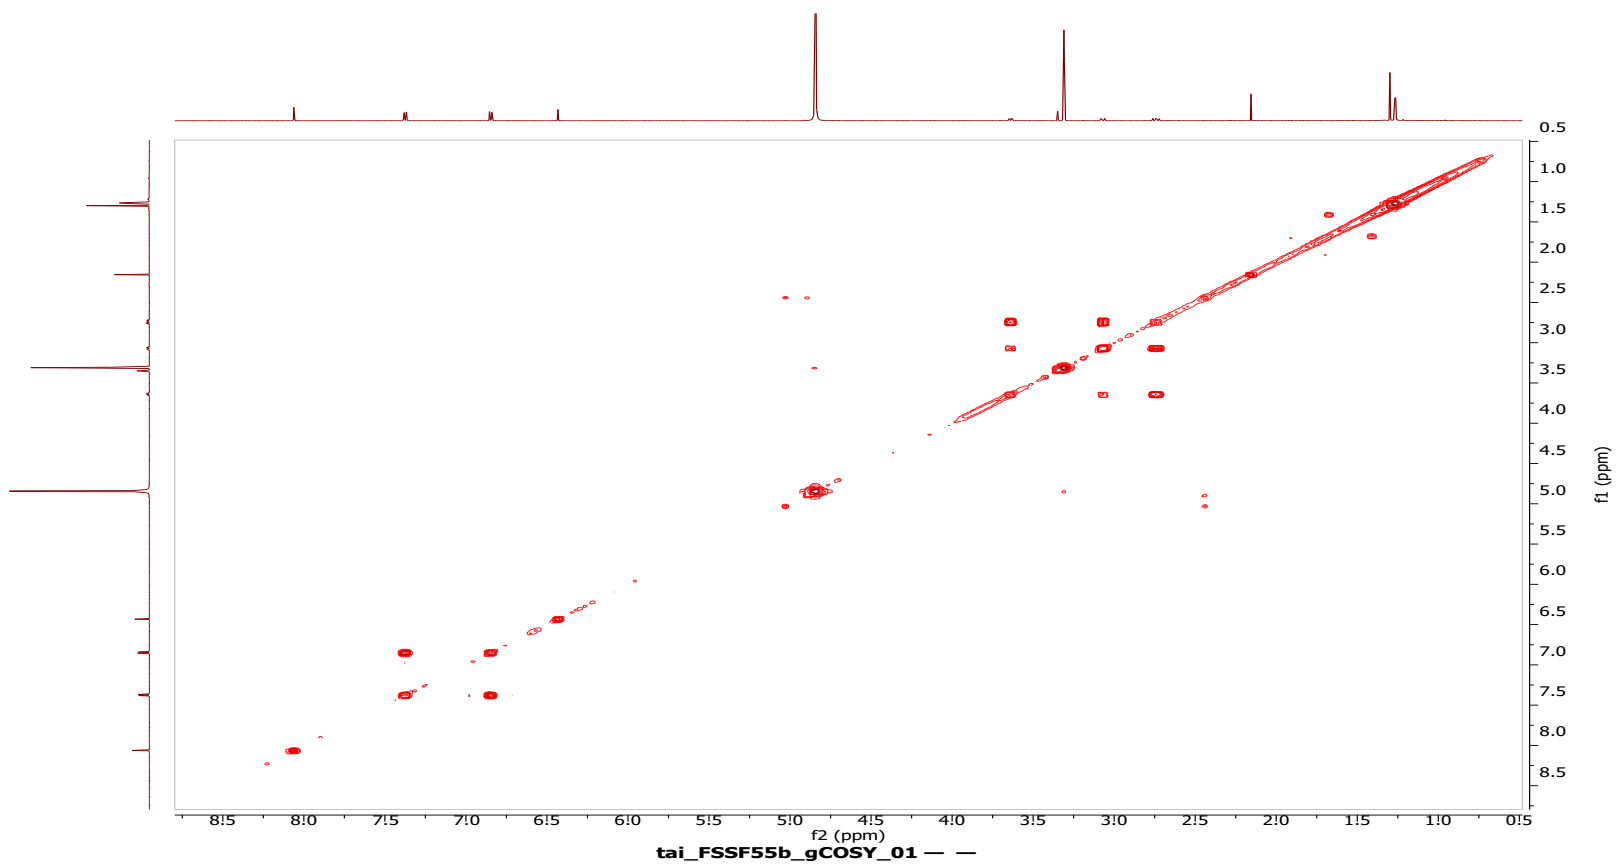

Figure S-13. COSY spectrum of compound 3

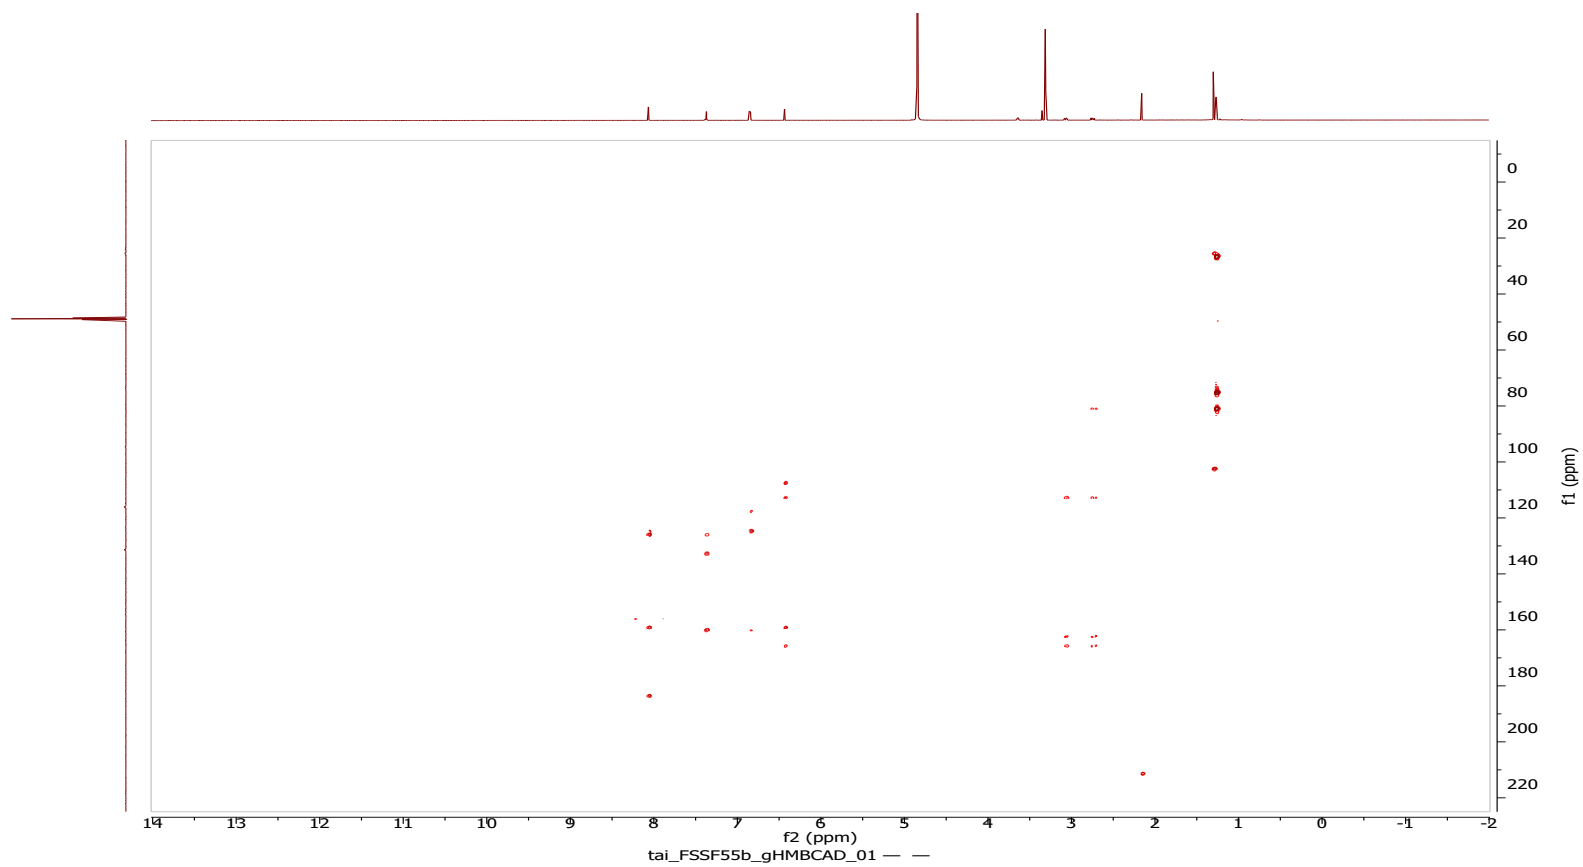

**Figure S-14.** HMBC spectrum of compound **3**

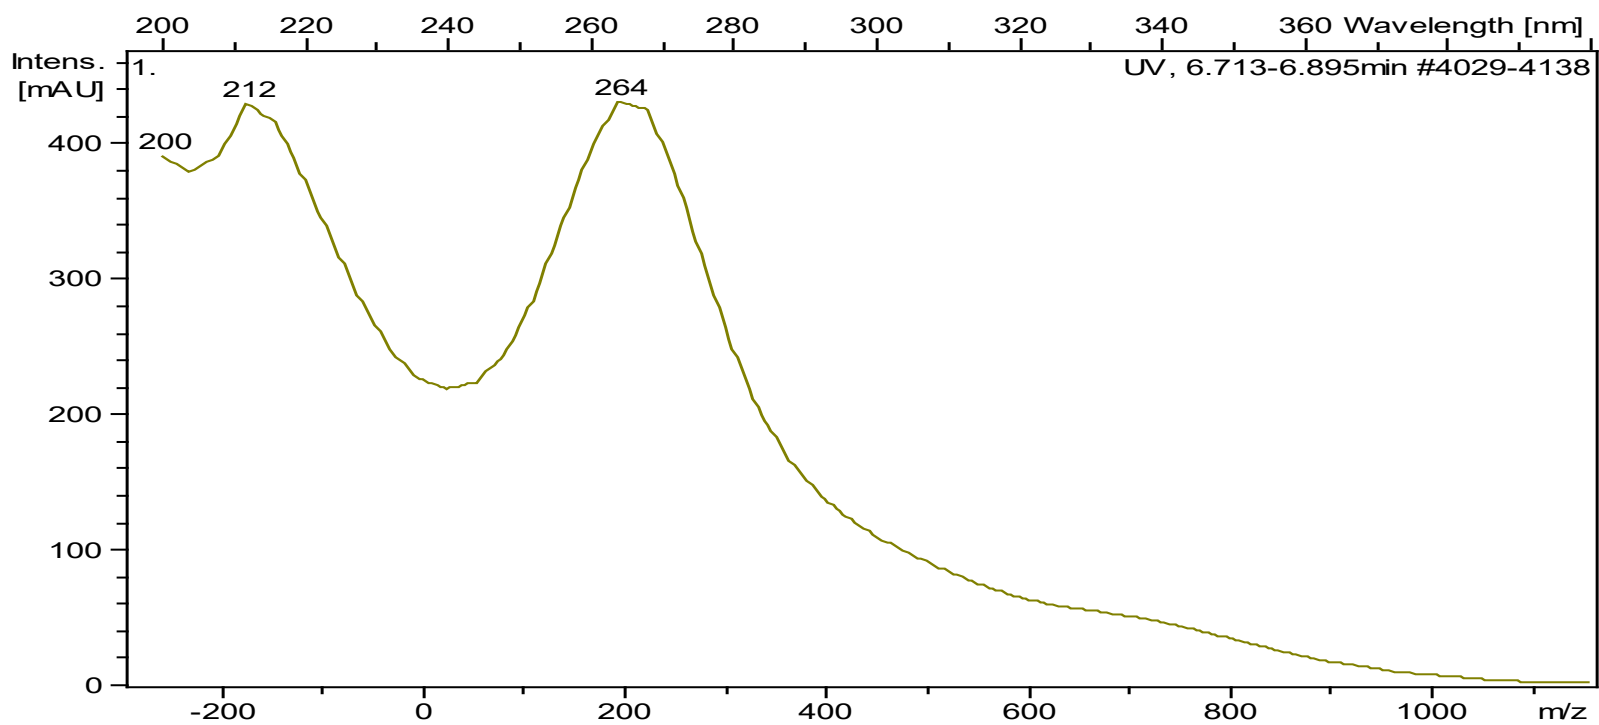

Figure S-15. LC-UV spectrum of compound 3



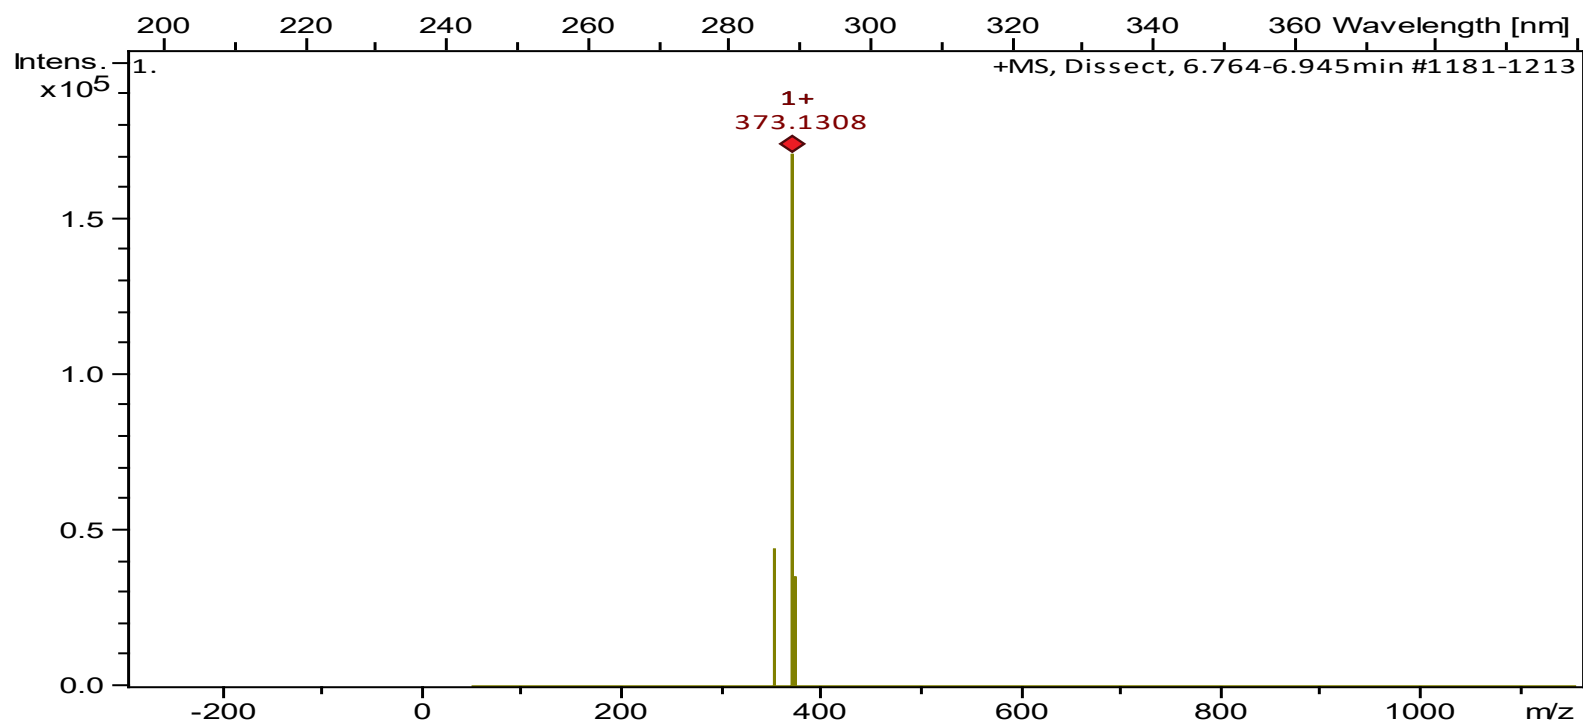

Figure S-16. HR-ESIMS spectrum of compound 3

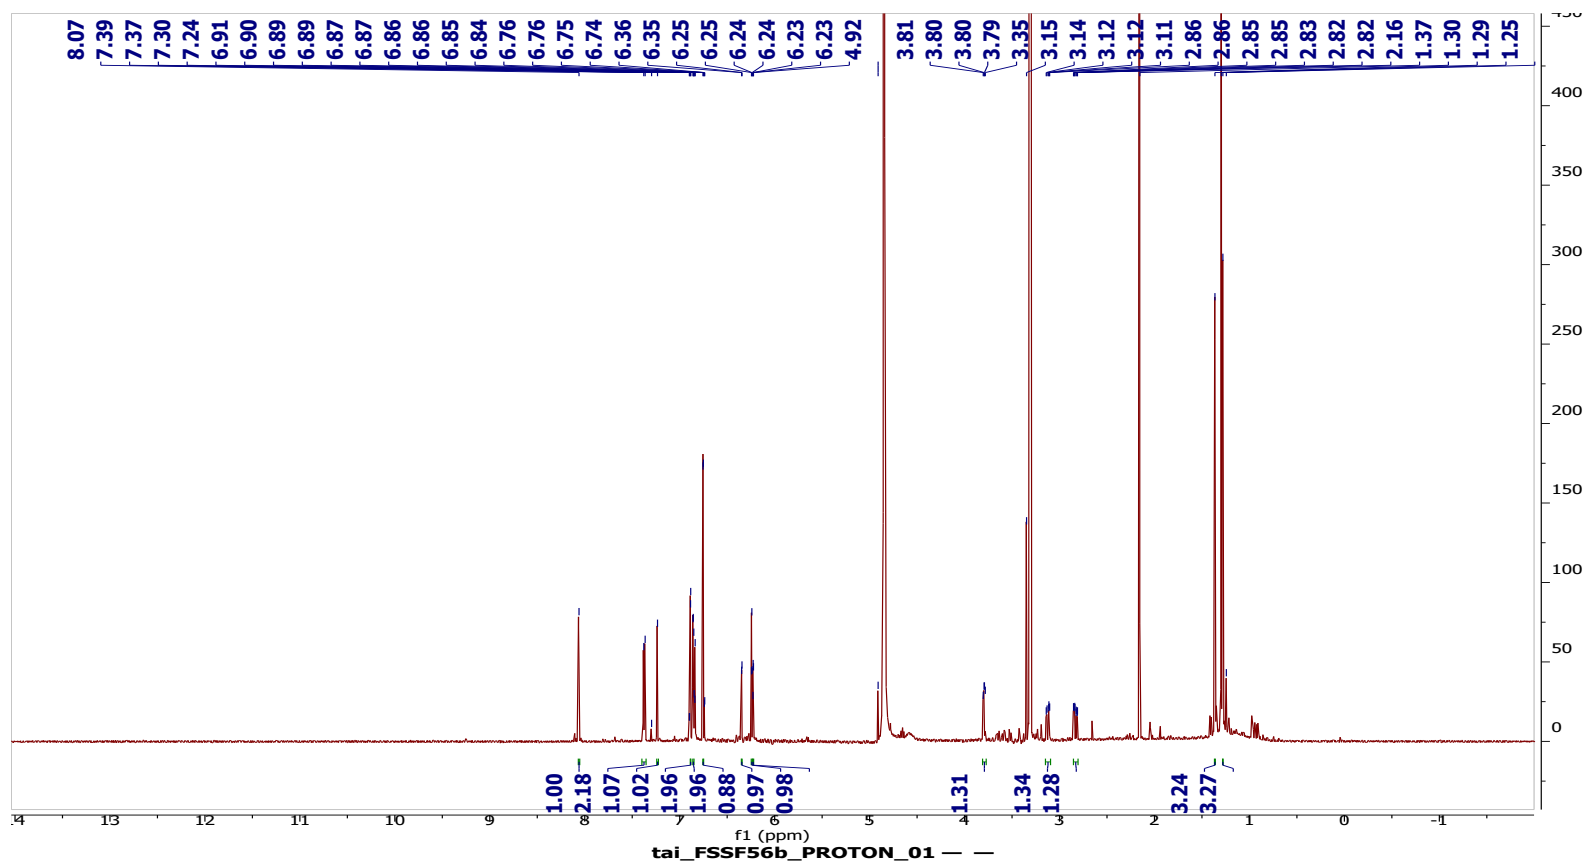

**Figure S-17.**  $^1\text{H}$ -NMR spectrum of compounds **4** and **5** (600 MHz,  $\text{CD}_3\text{OD}$ )

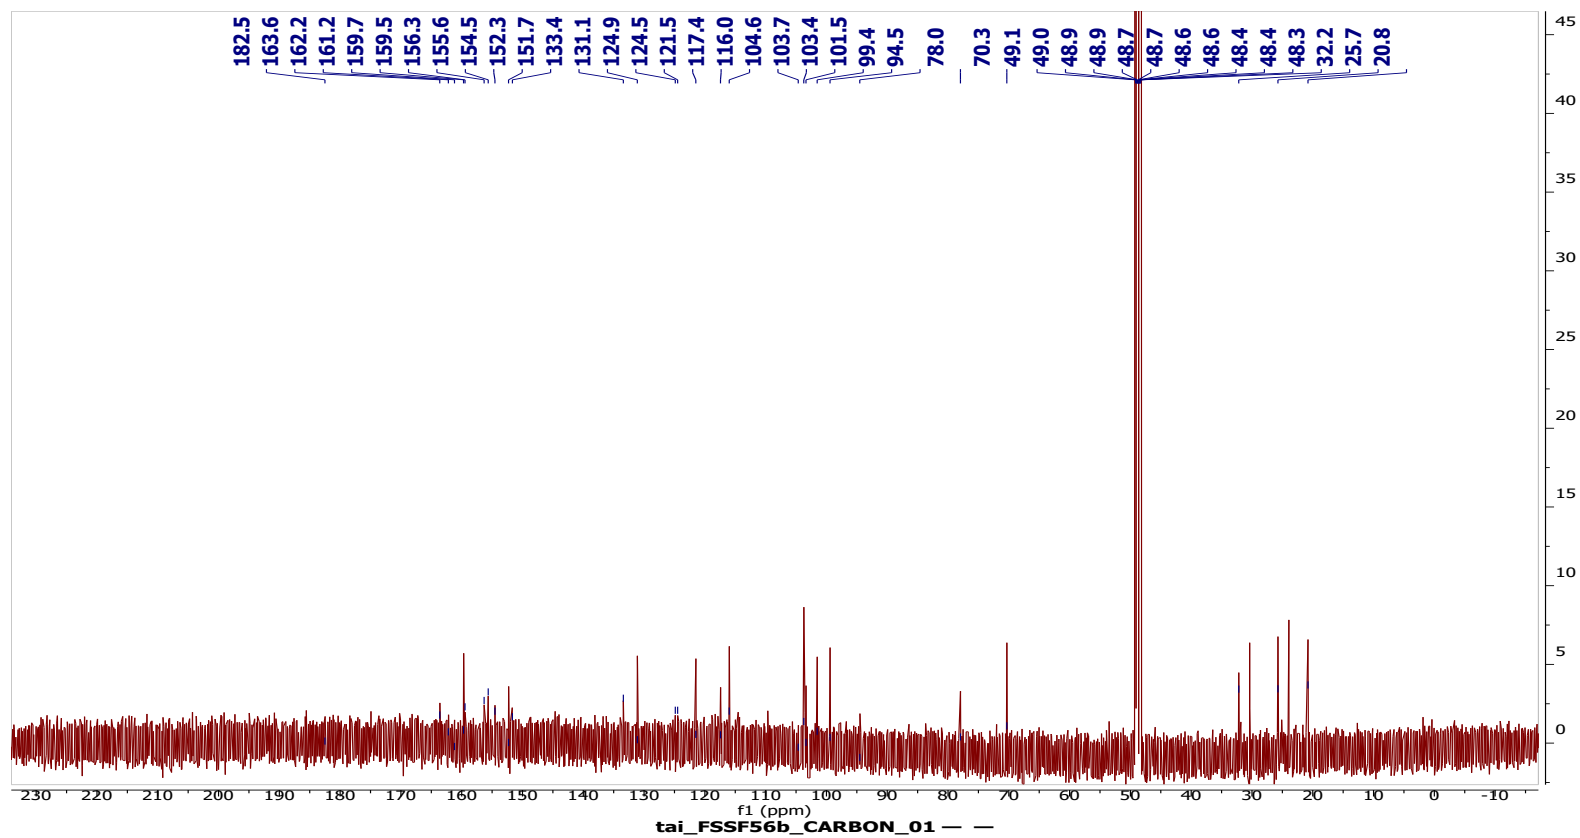

**Figure S-18.**  $^{13}\text{C}$ -NMR spectrum of compounds **4** and **5** (150 MHz,  $\text{CD}_3\text{OD}$ )

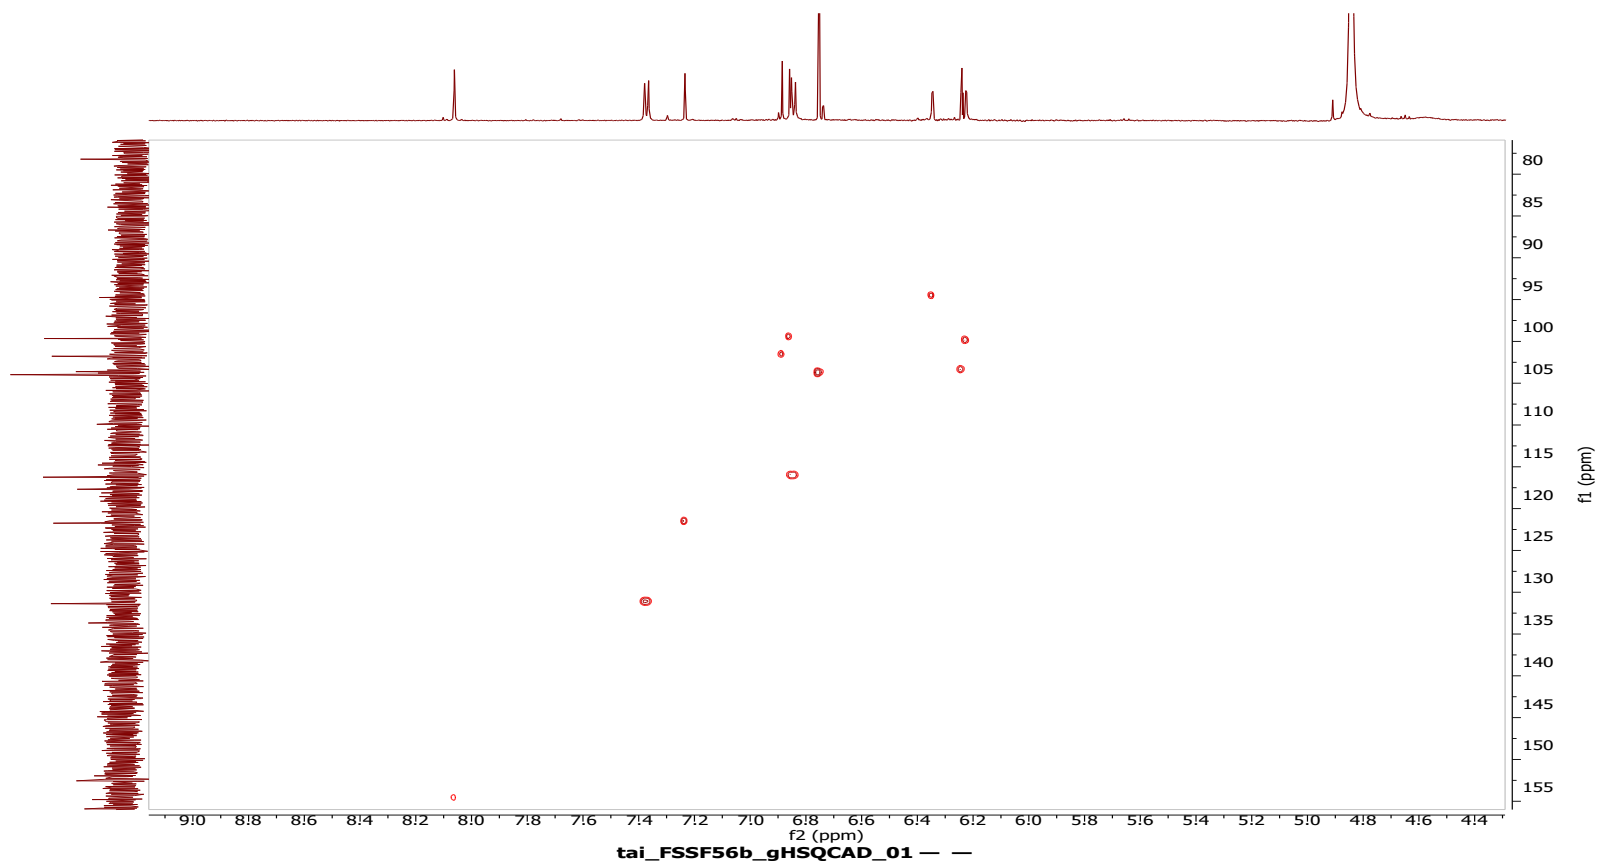

Figure S-19. HSQC spectrum of compounds 4 and 5

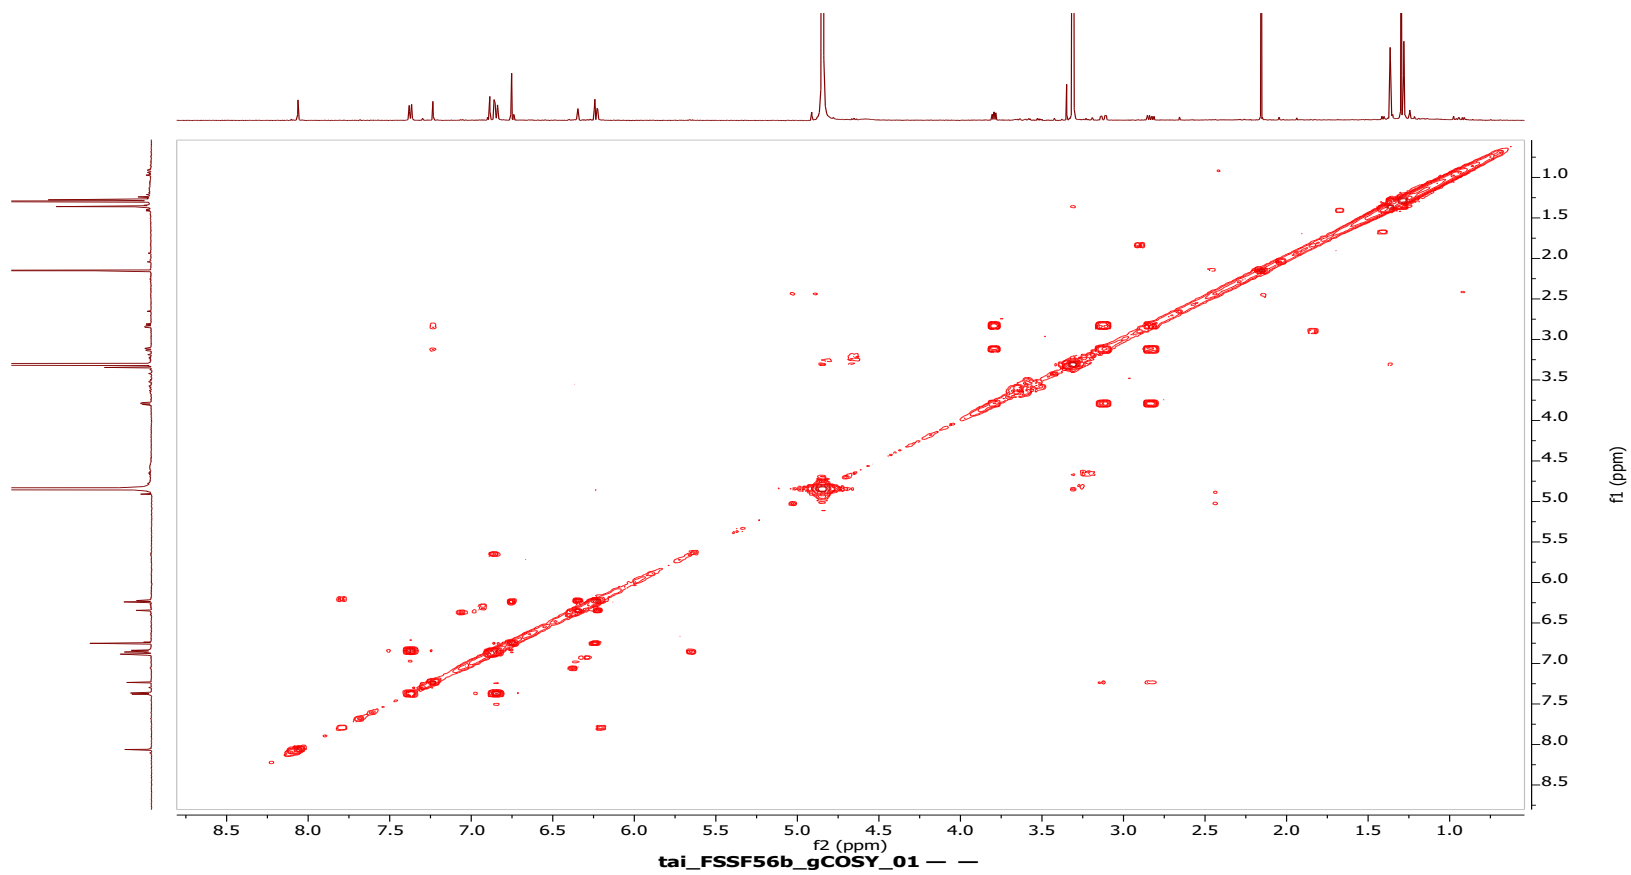

Figure S-20. COSY spectrum of compounds 4 and 5

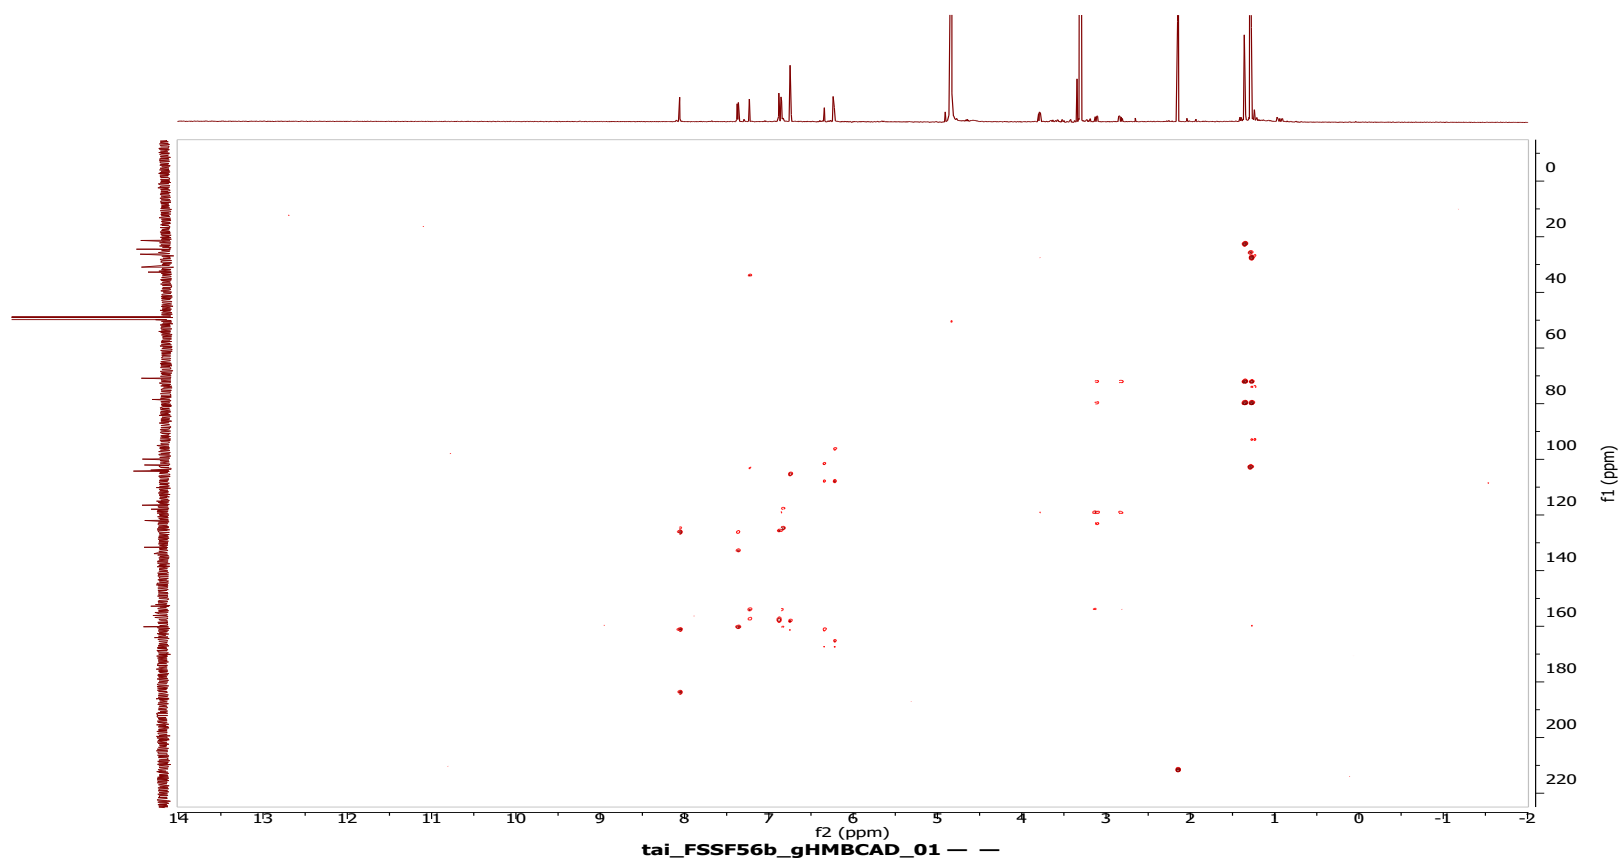

Figure S-21. HMBC spectrum of compounds 4 and 5

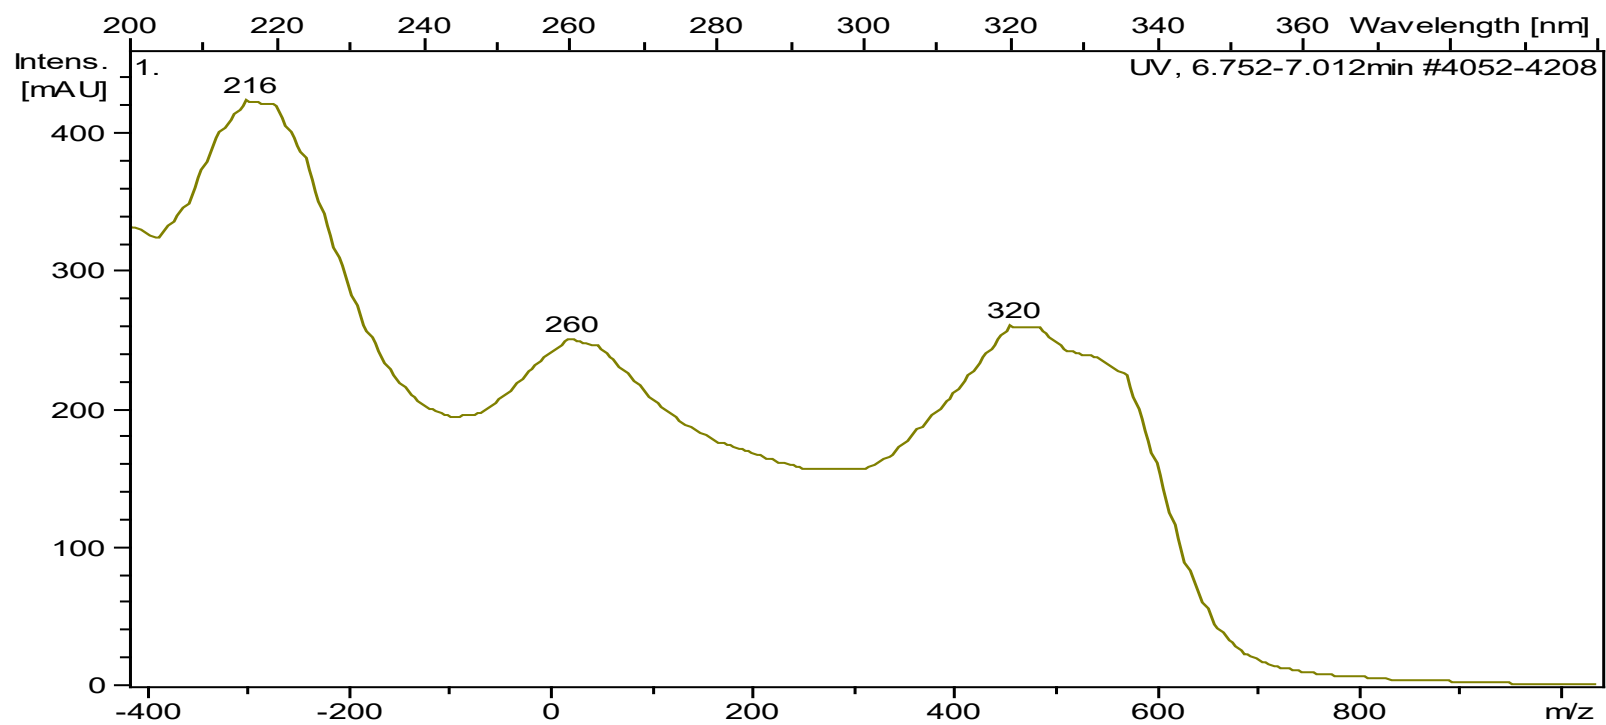

Figure S-22. LC-UV spectrum of compound 4

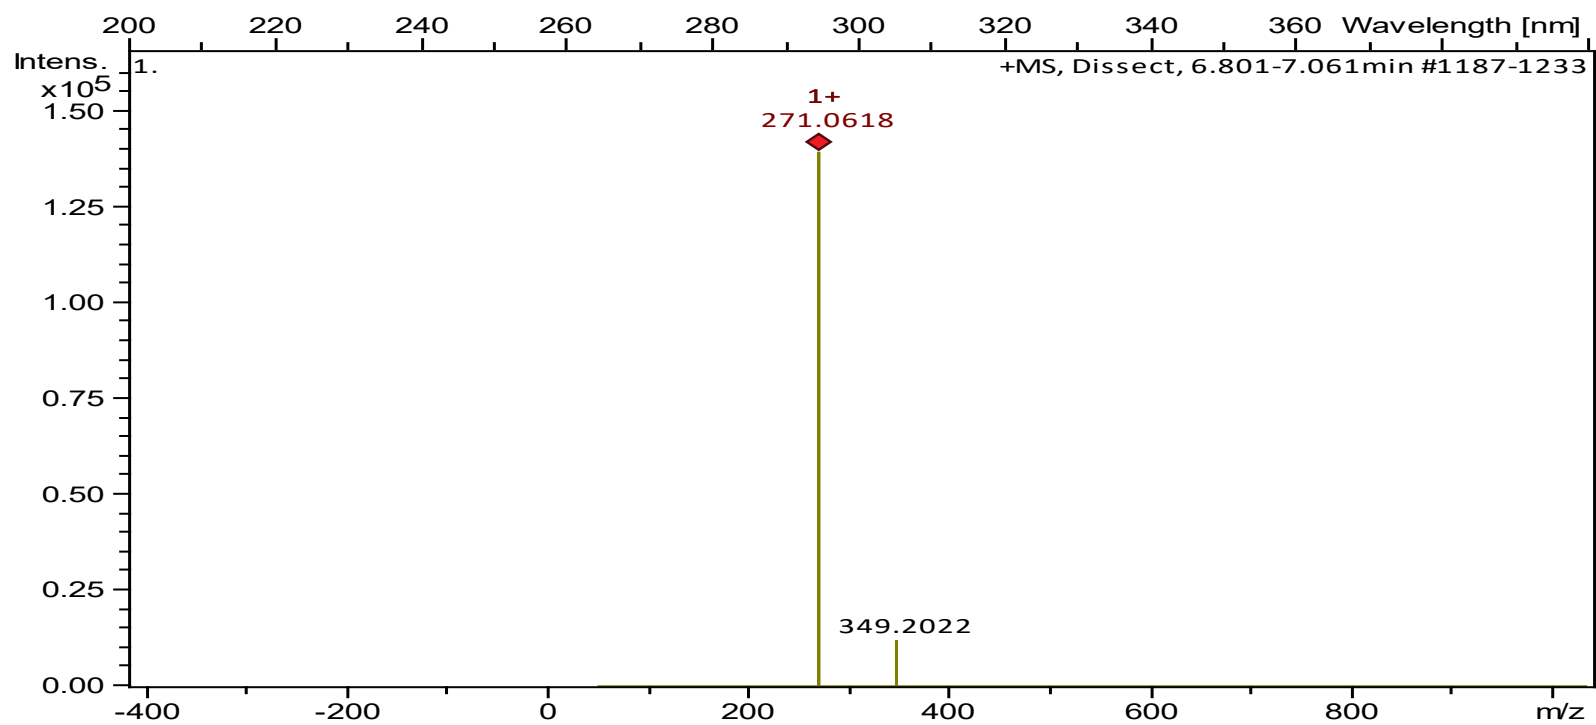

Figure S-23. HR-ESIMS spectrum of compound 4



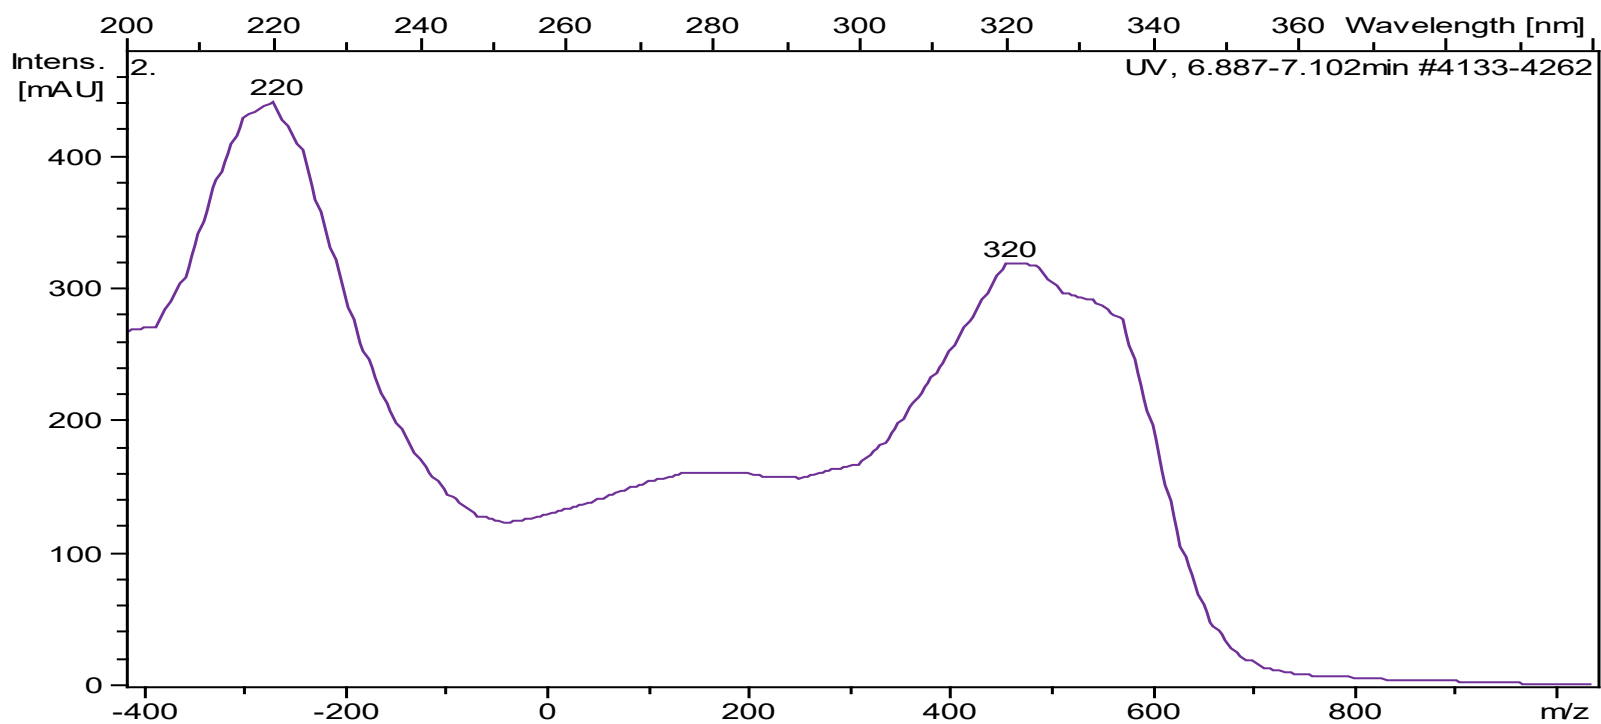

Figure S-24. LC-UV spectrum of compound 5

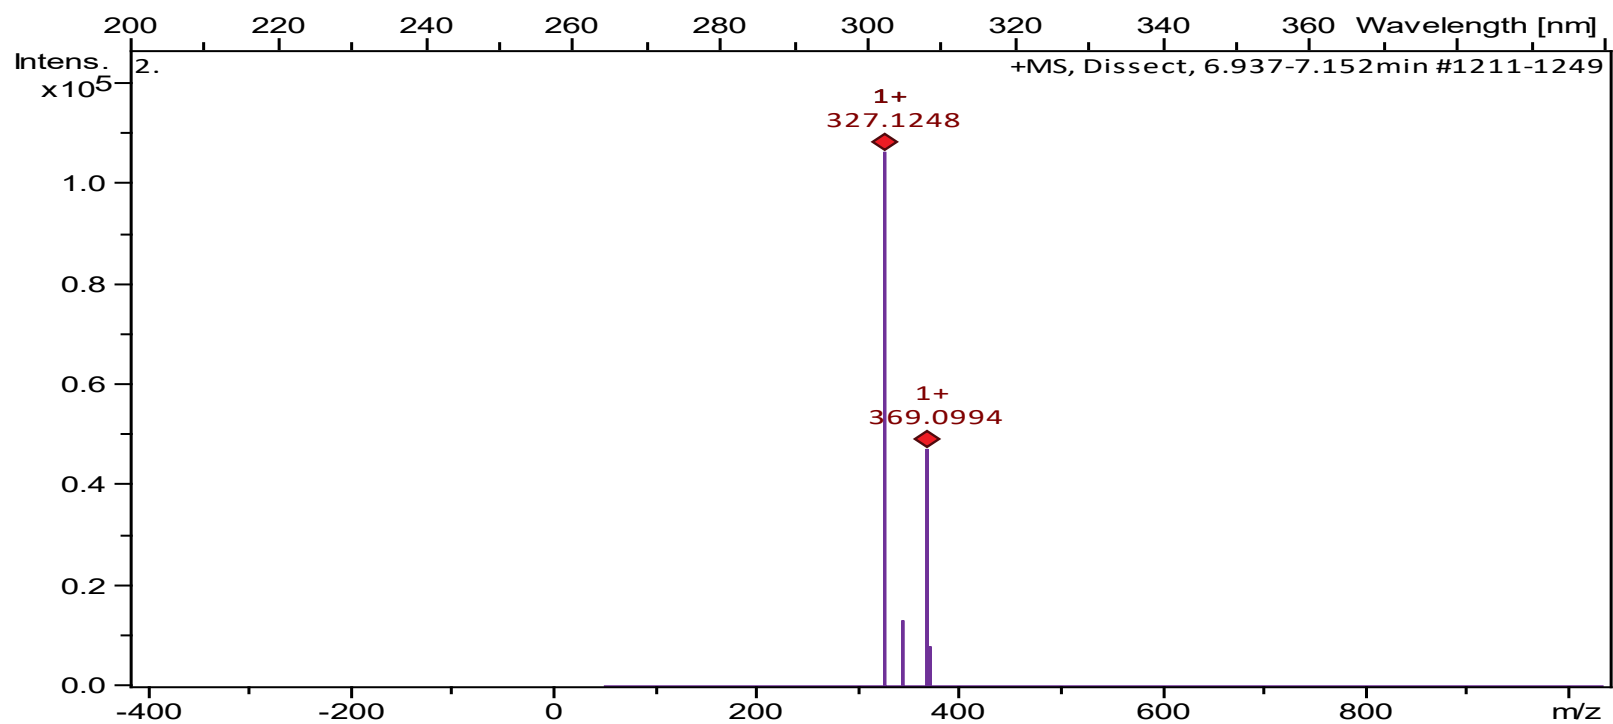

Figure S-25. HR-ESIMS spectrum of compound 5

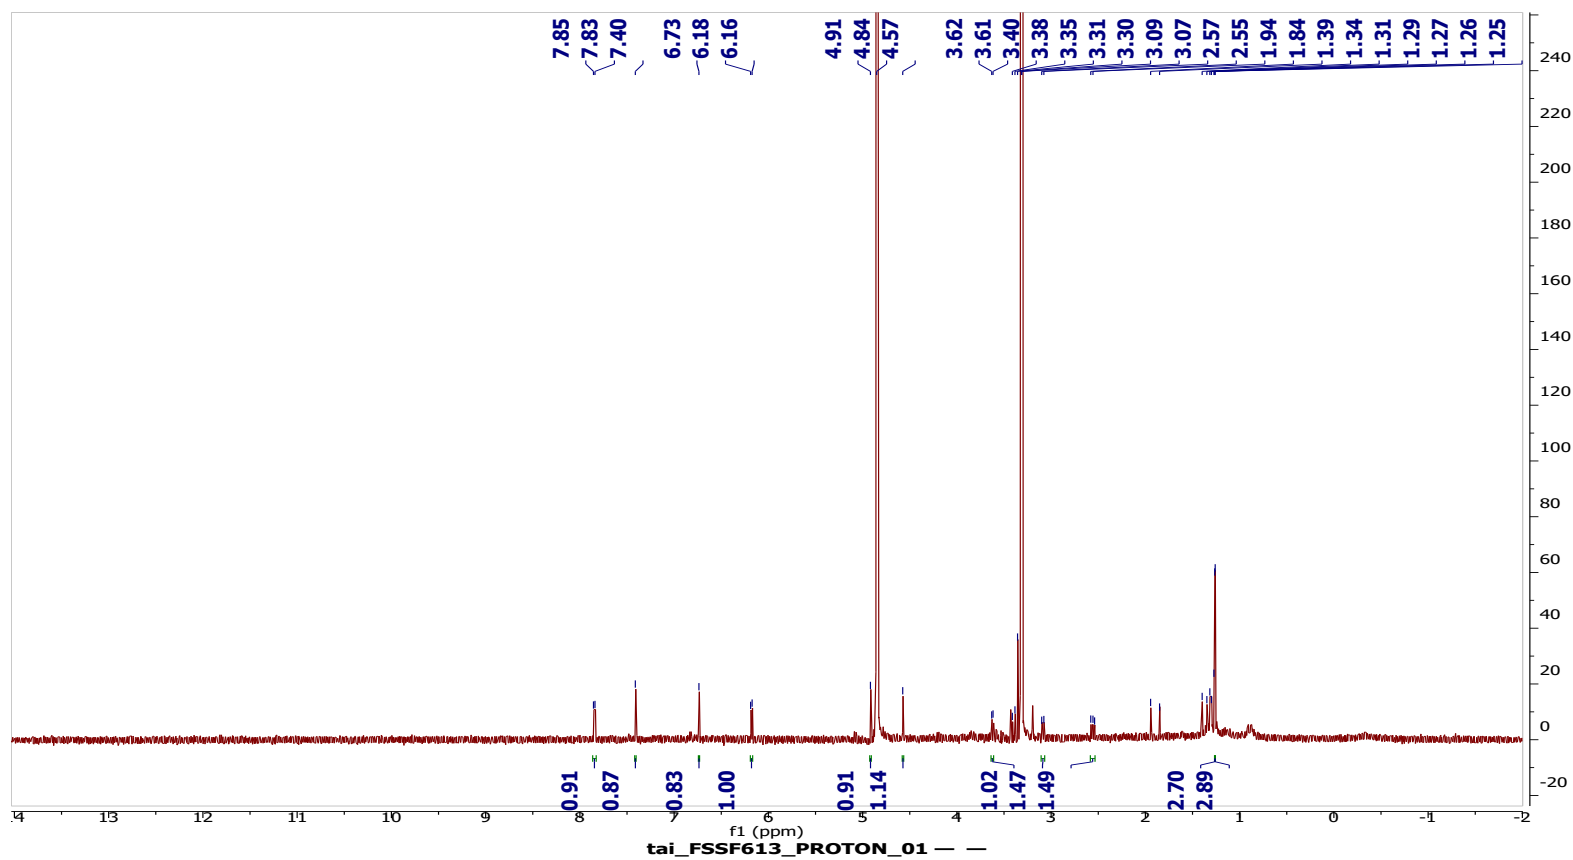

Figure S-26. <sup>1</sup>H-NMR spectrum of compound 6 (600 MHz, CD<sub>3</sub>OD)

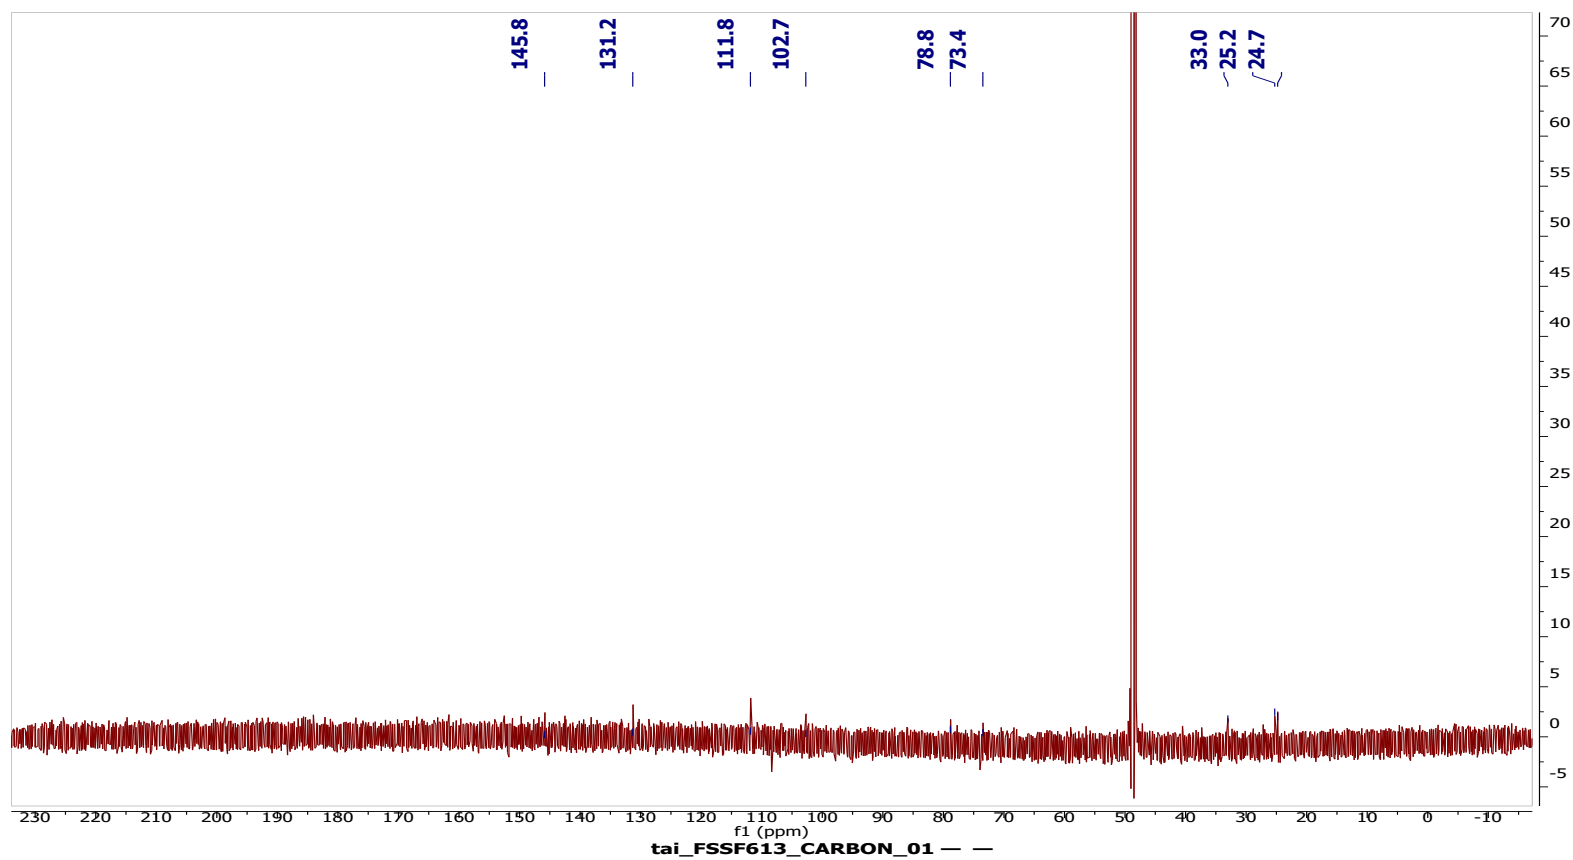

**Figure S-27.** <sup>13</sup>C-NMR spectrum of compound 6 (150 MHz, CD<sub>3</sub>OD)

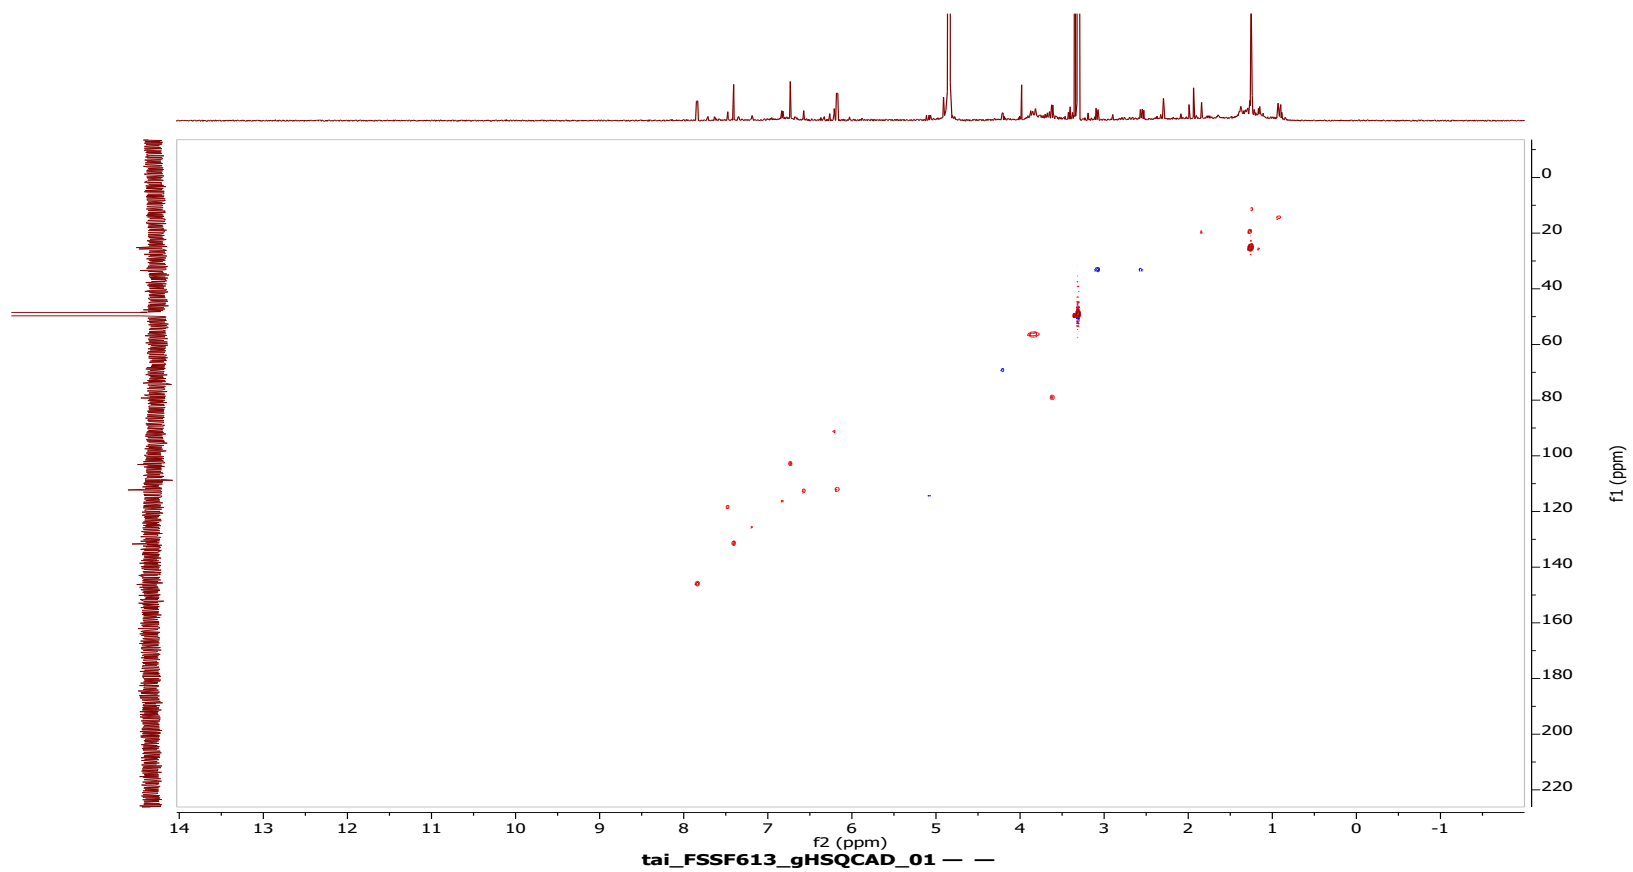

Figure S-28. HSQC spectrum of compound 6

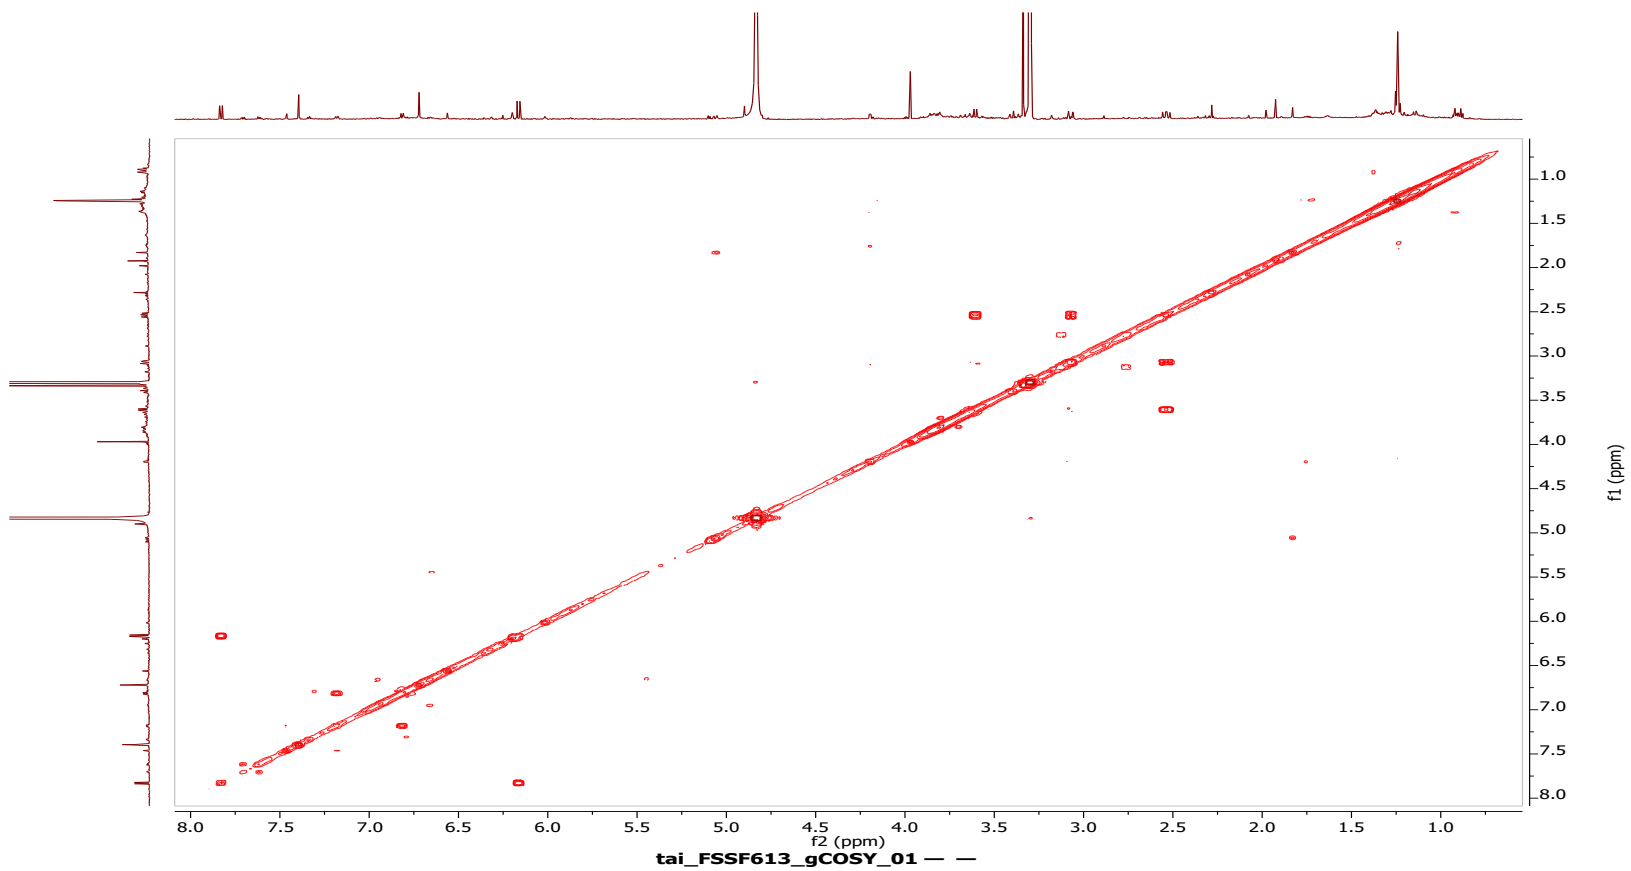

Figure S-29. COSY spectrum of compound 6

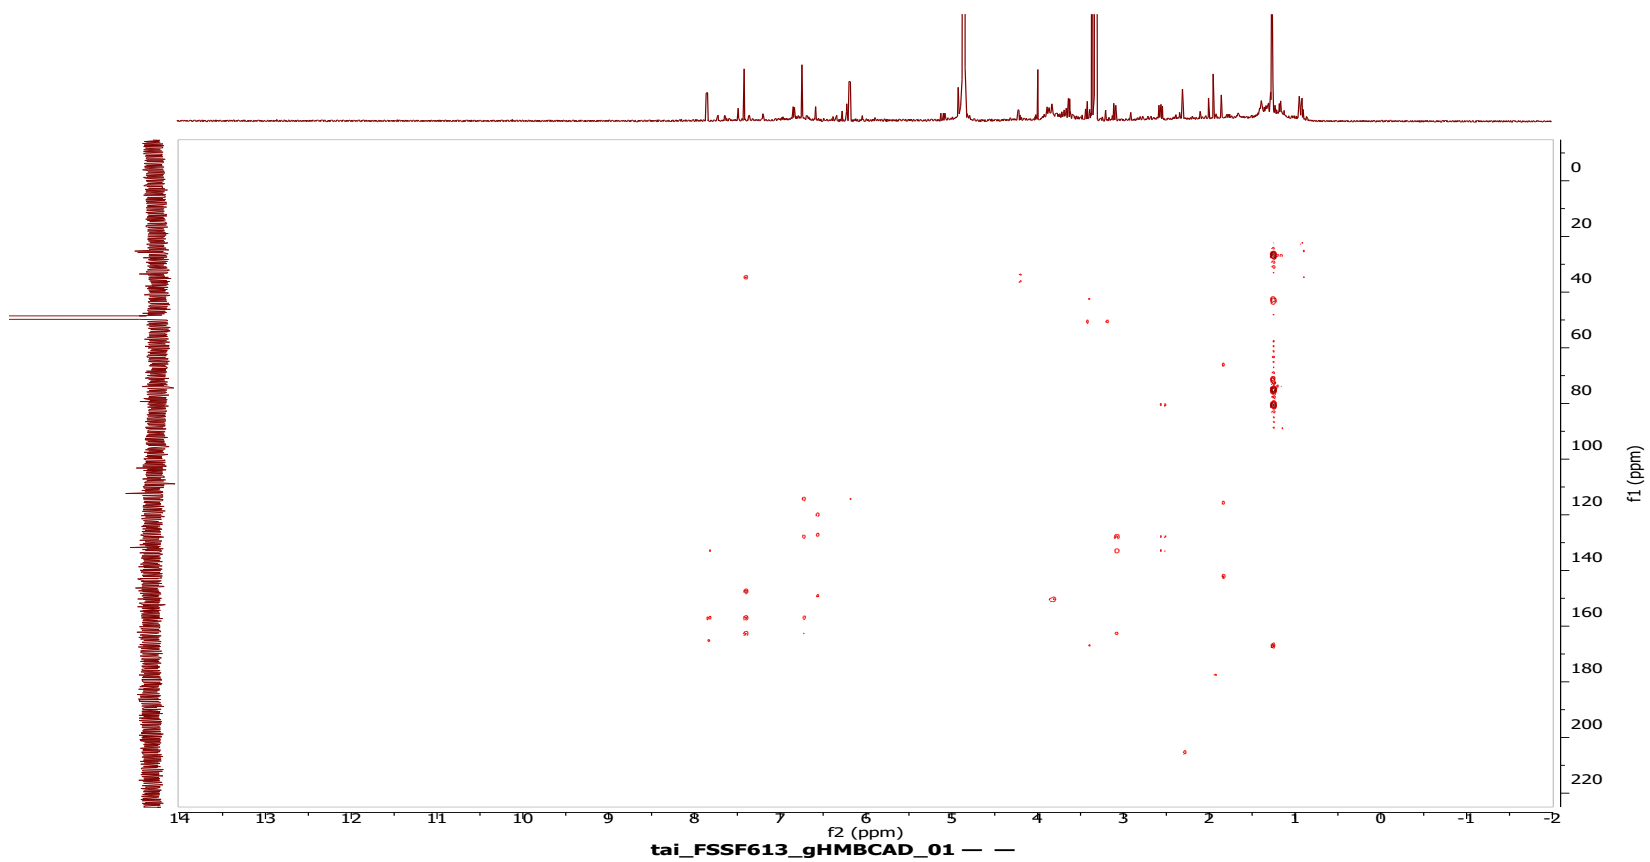

Figure S-30. HMBC spectrum of compound 6

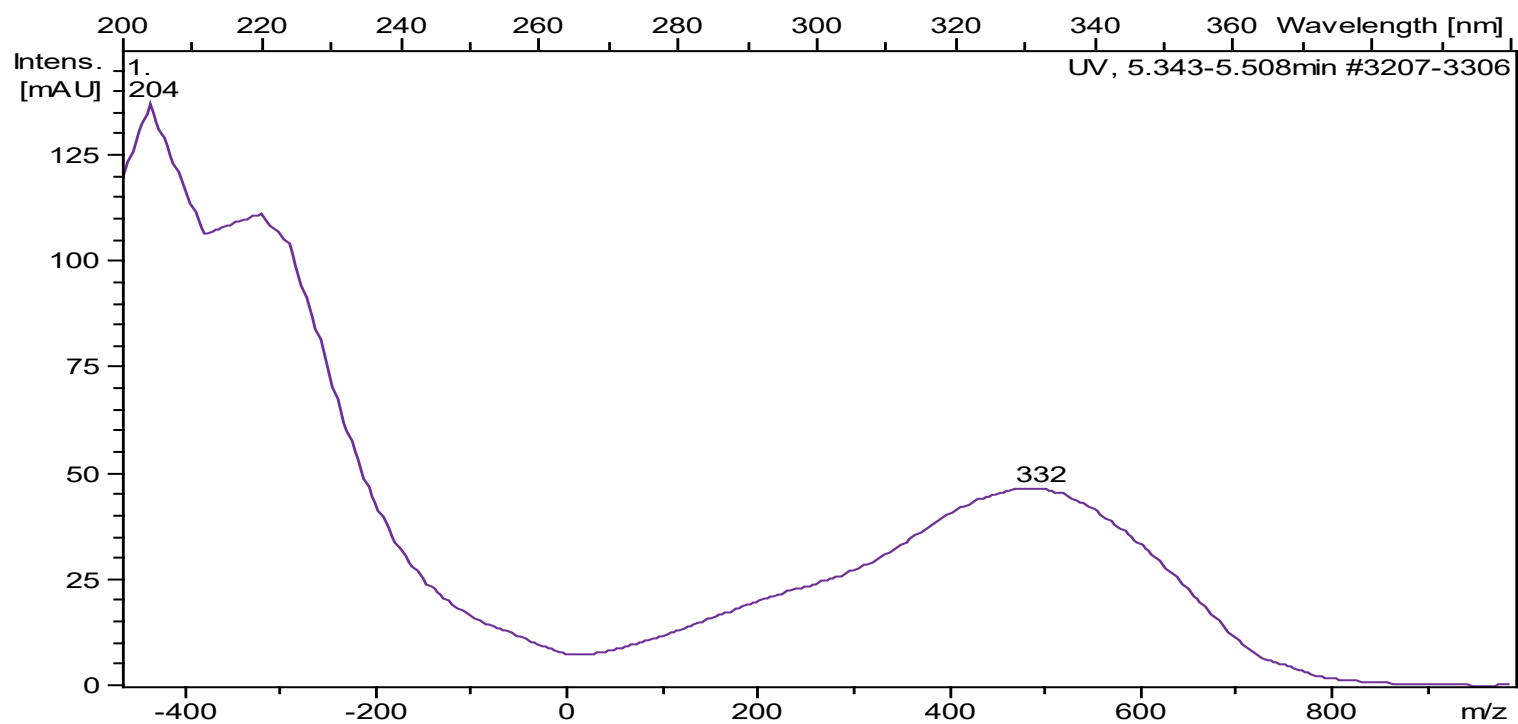

Figure S-31. LC-UV spectrum of compound 6



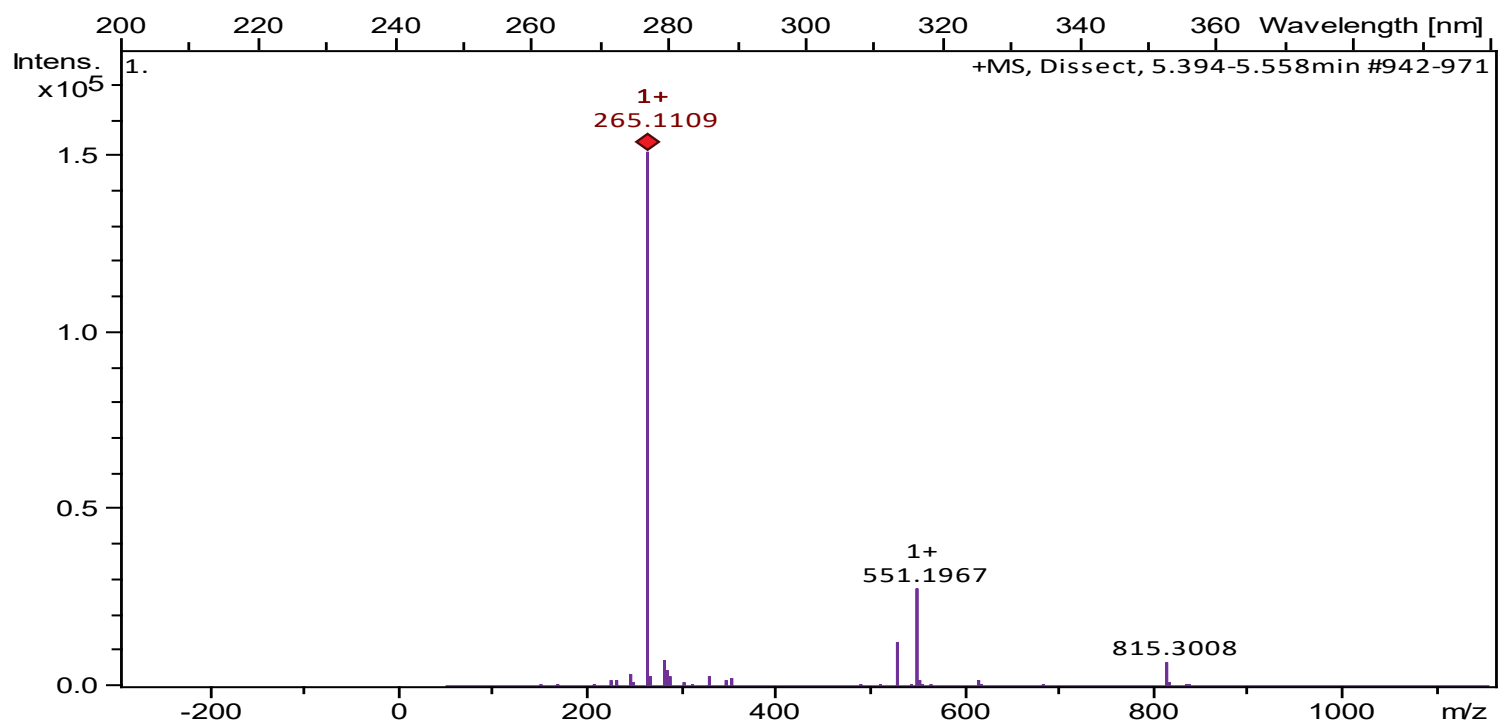

Figure S-32. HR-ESIMS spectrum of compound 6

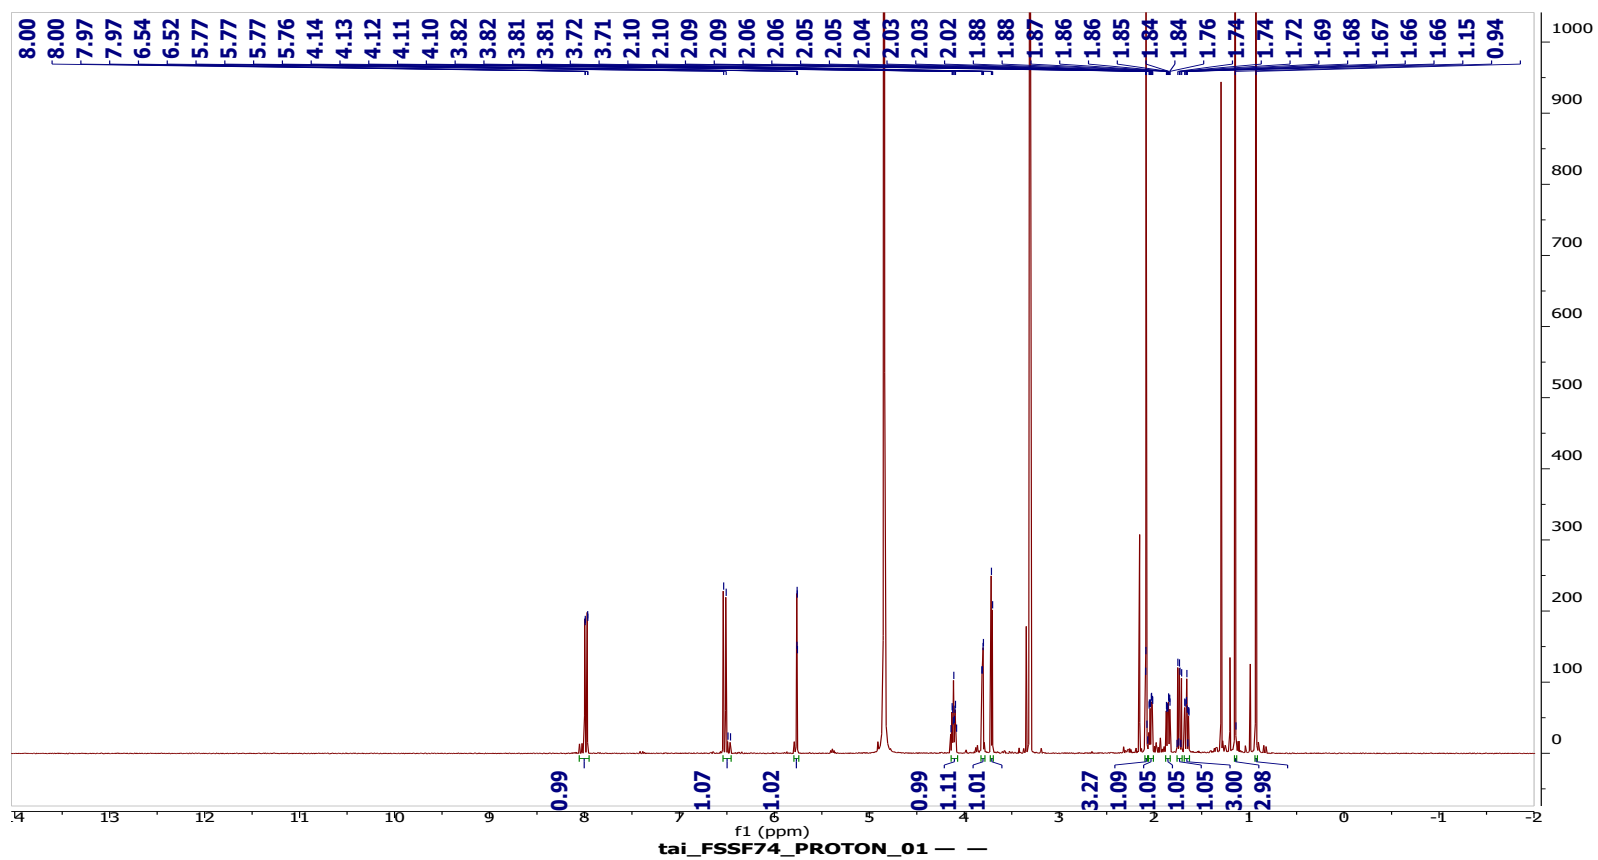

**Figure S-33.**  $^1\text{H}$ -NMR spectrum for compound **7** (600 MHz,  $\text{CD}_3\text{OD}$ )

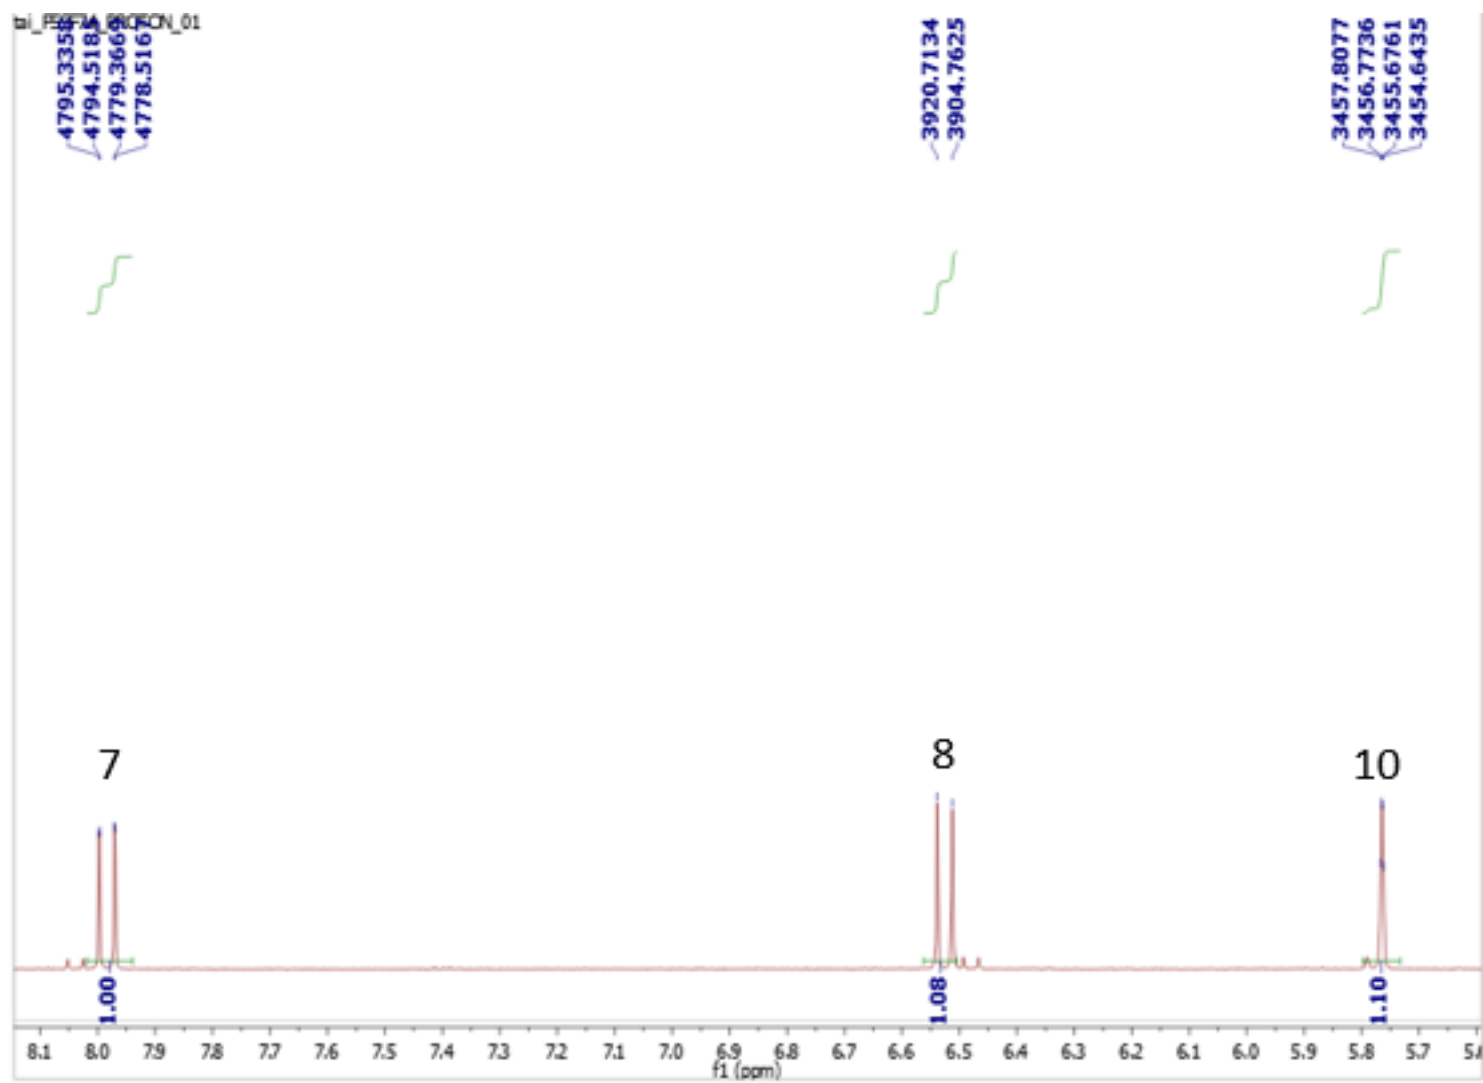

Figure S-34. <sup>1</sup>H-NMR spectrum of compound 7 (600 MHz, CD<sub>3</sub>OD), expanded region showing the signals of H-7, H-8, H-10.

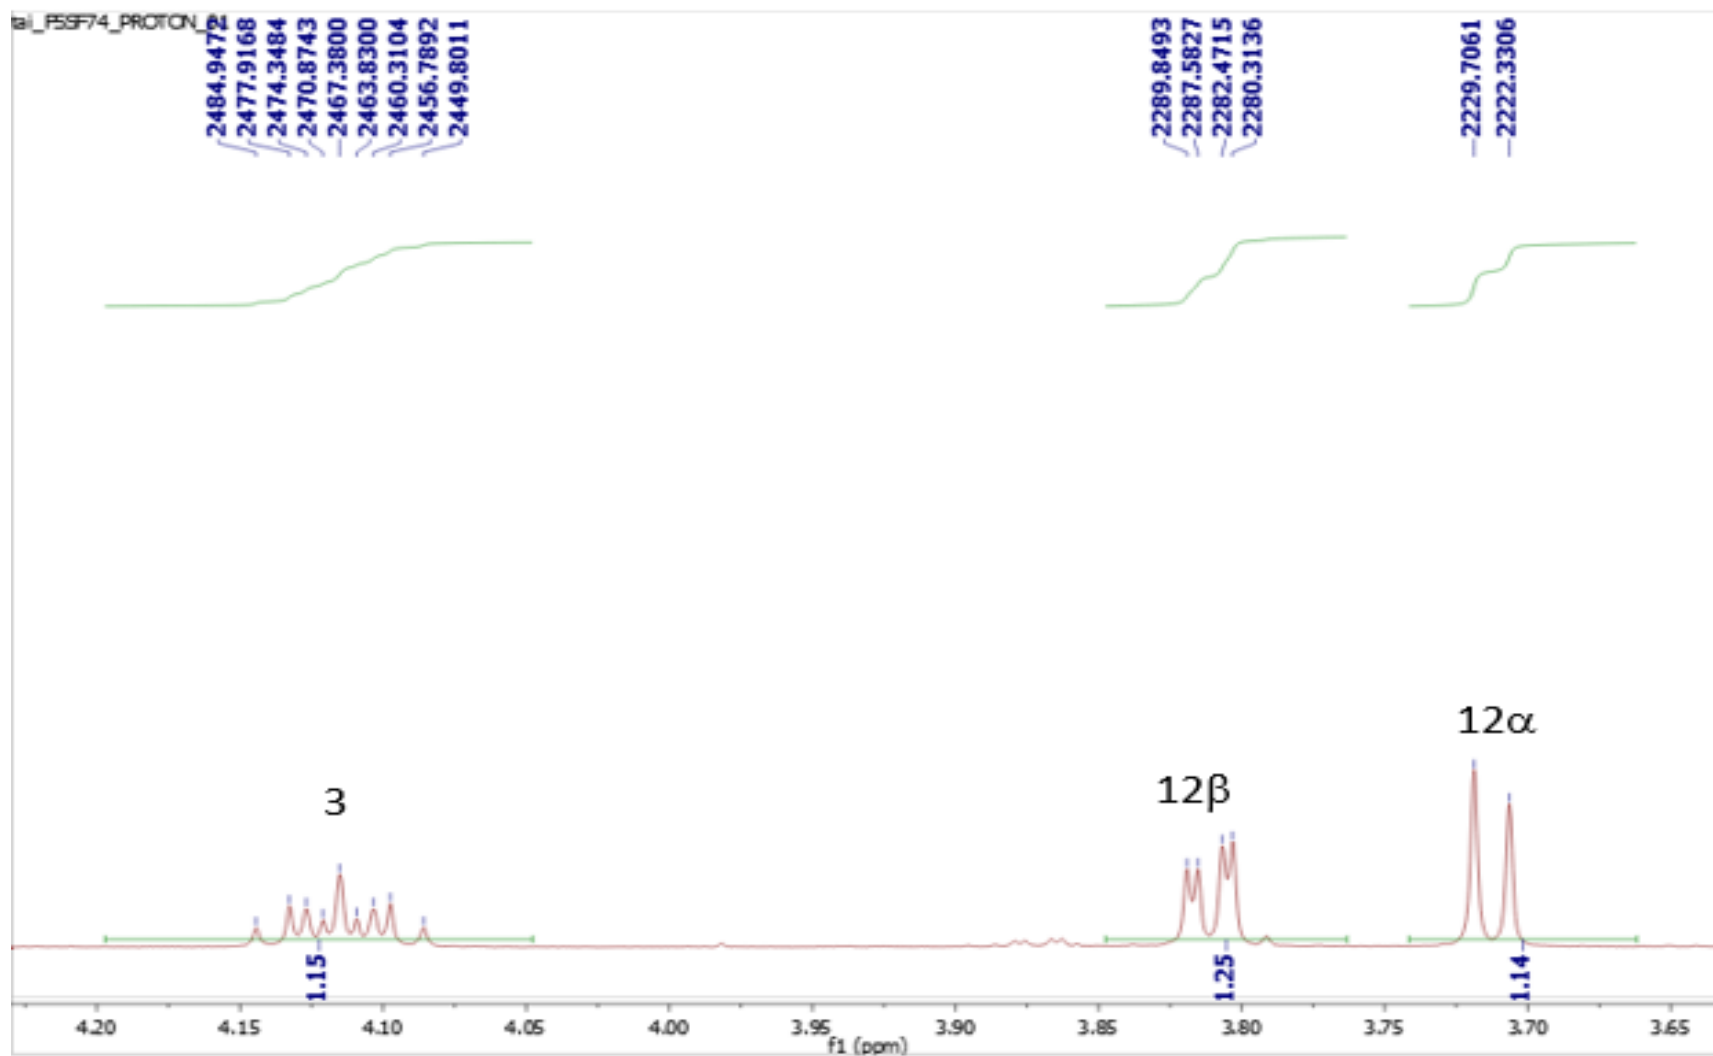

Figure S-35. <sup>1</sup>H-NMR spectrum of compound 7 (600 MHz, CD<sub>3</sub>OD), expanded region showing the signals of H-3, H-12β, H-12α.

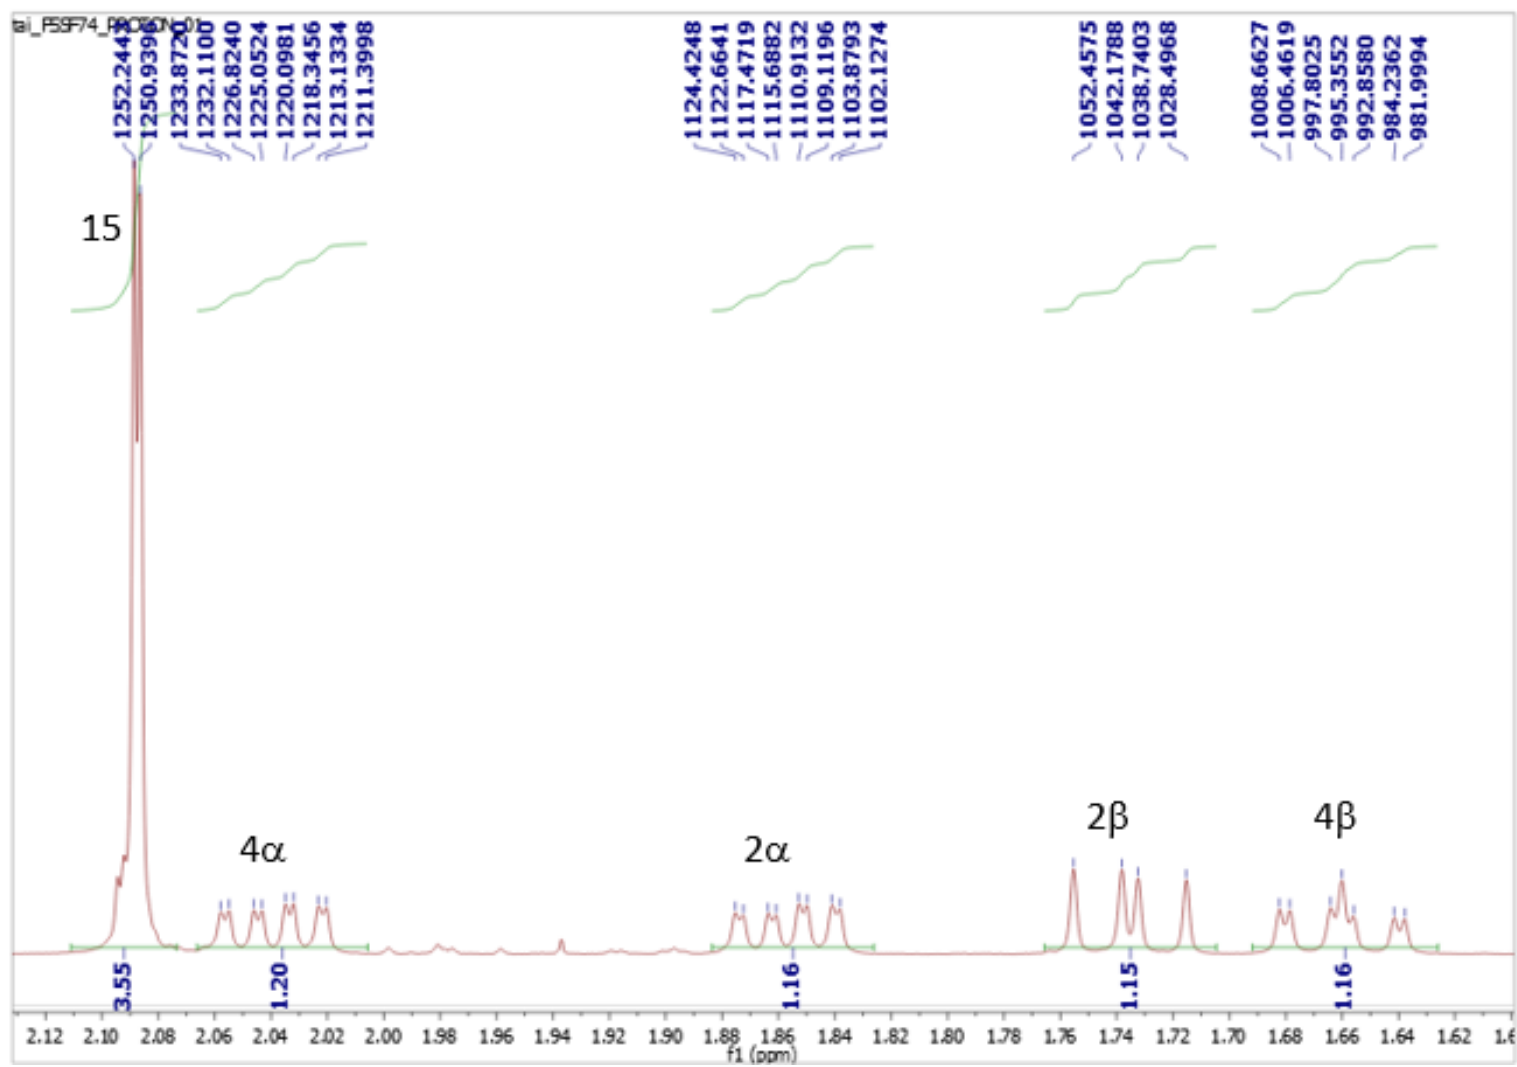

Figure S-36. <sup>1</sup>H-NMR spectrum of compound 7 (600 MHz, CD<sub>3</sub>OD), expanded region showing the signals of CH<sub>3</sub>-15, H-2α, H-4α, H-2β and H-4β.

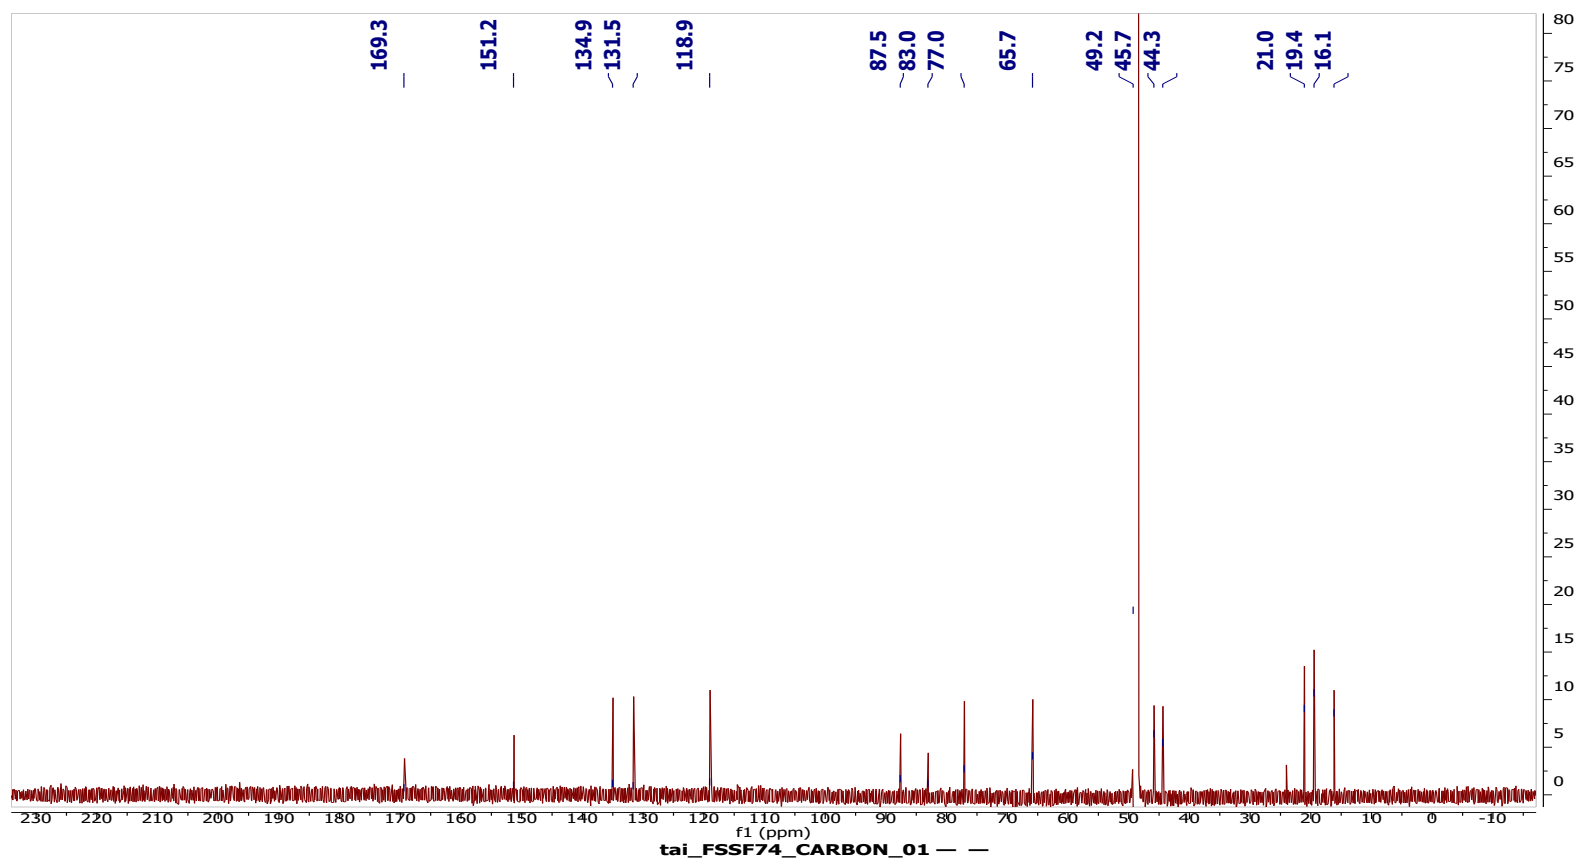

Figure S-37. <sup>13</sup>C-NMR spectrum of compound 7 (150 MHz, CD<sub>3</sub>OD)

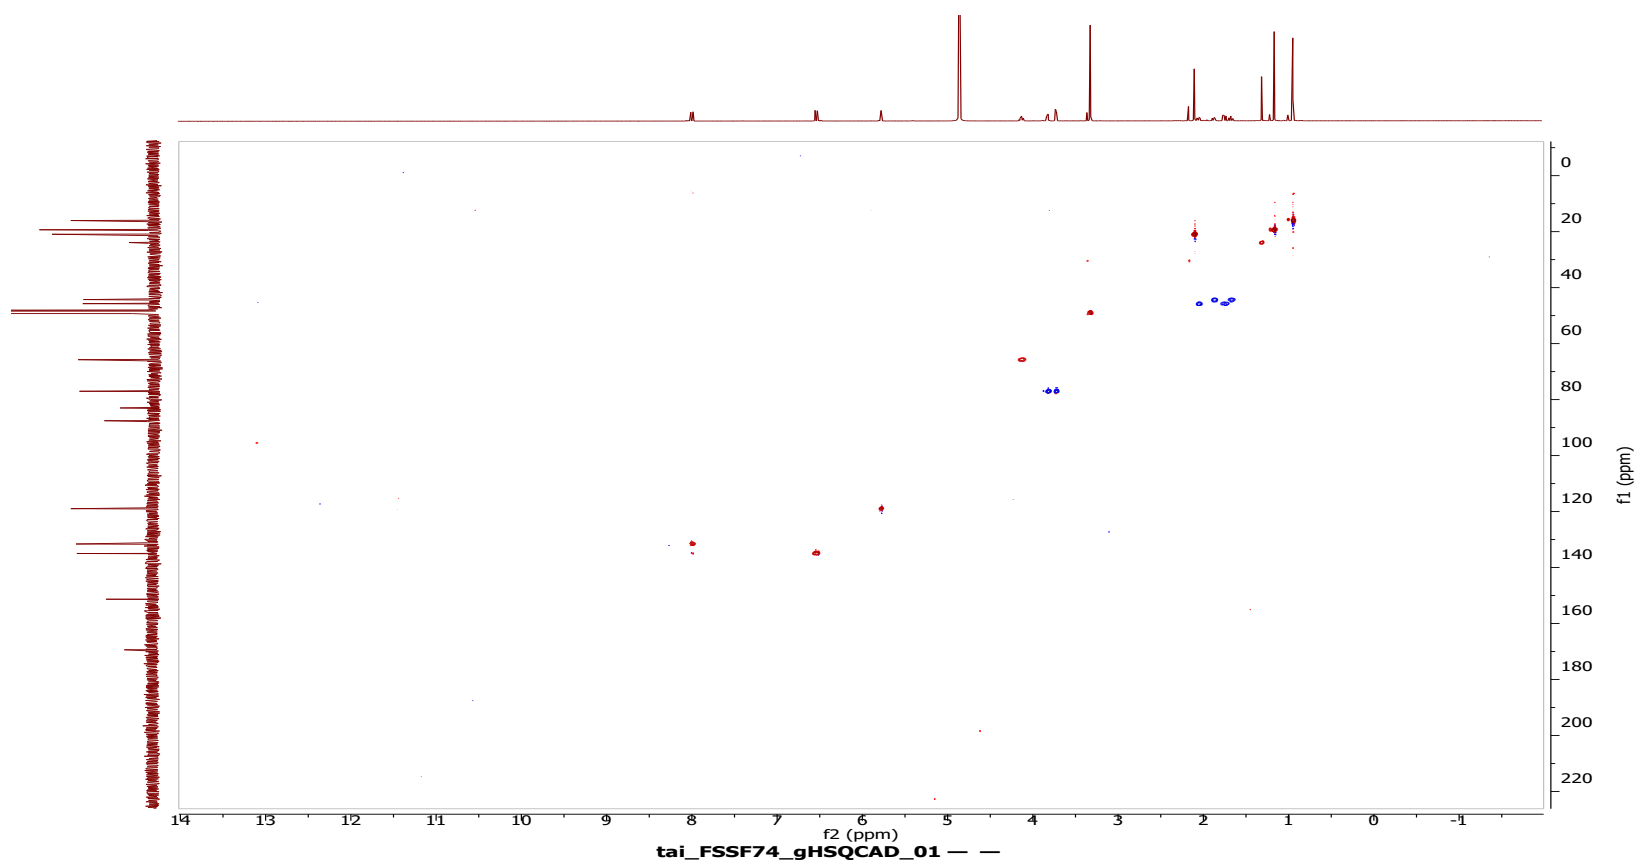

Figure S-38. HSQC spectrum of compound 7

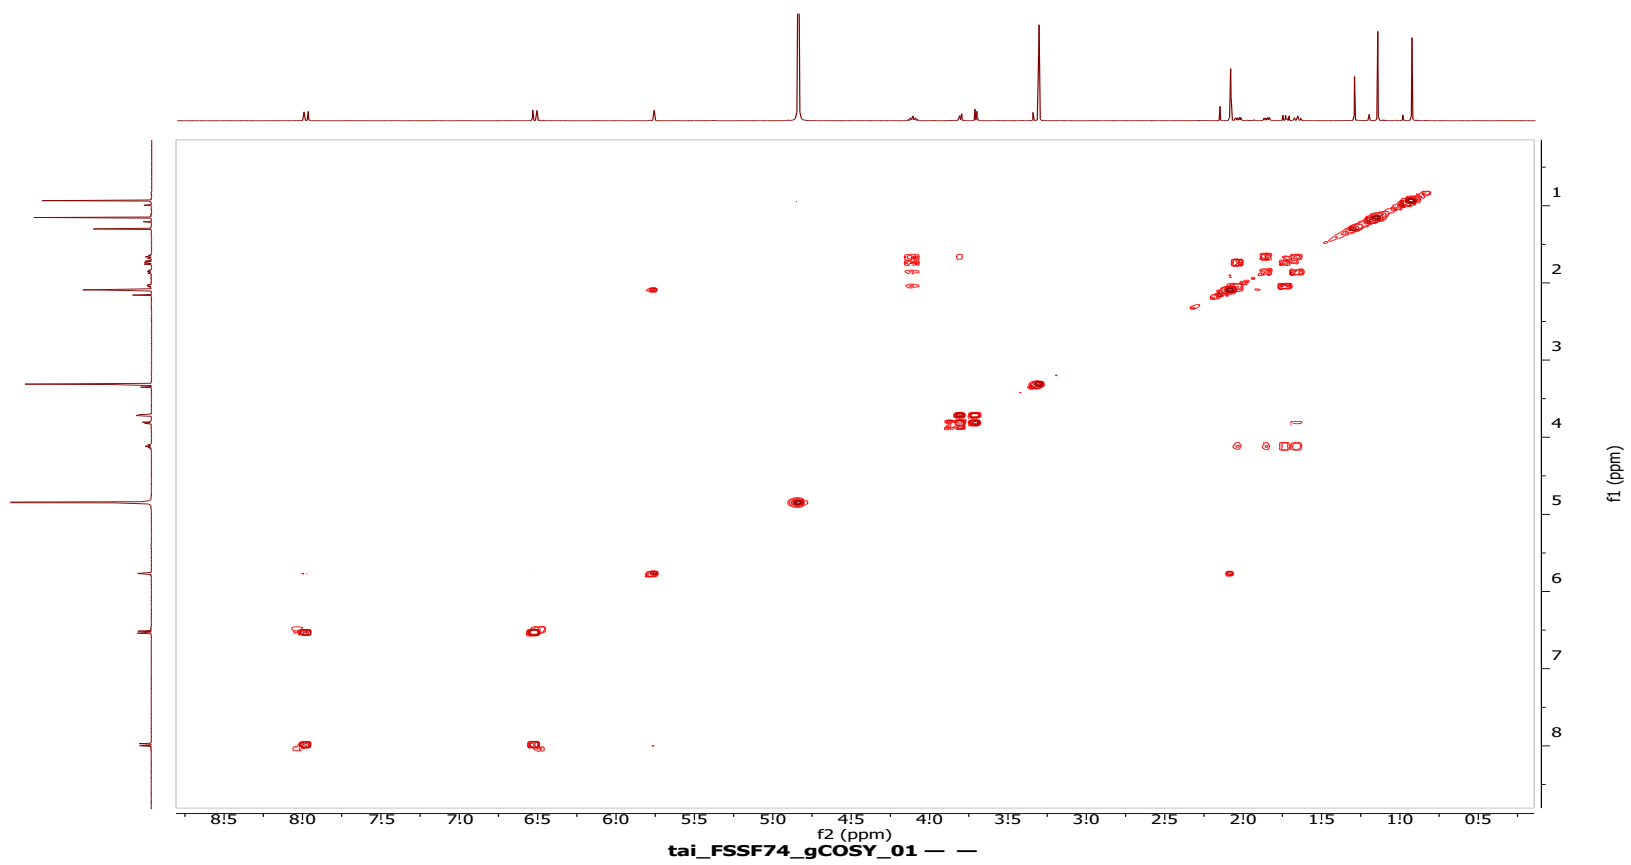

Figure S-39. COSY spectrum for compound 7



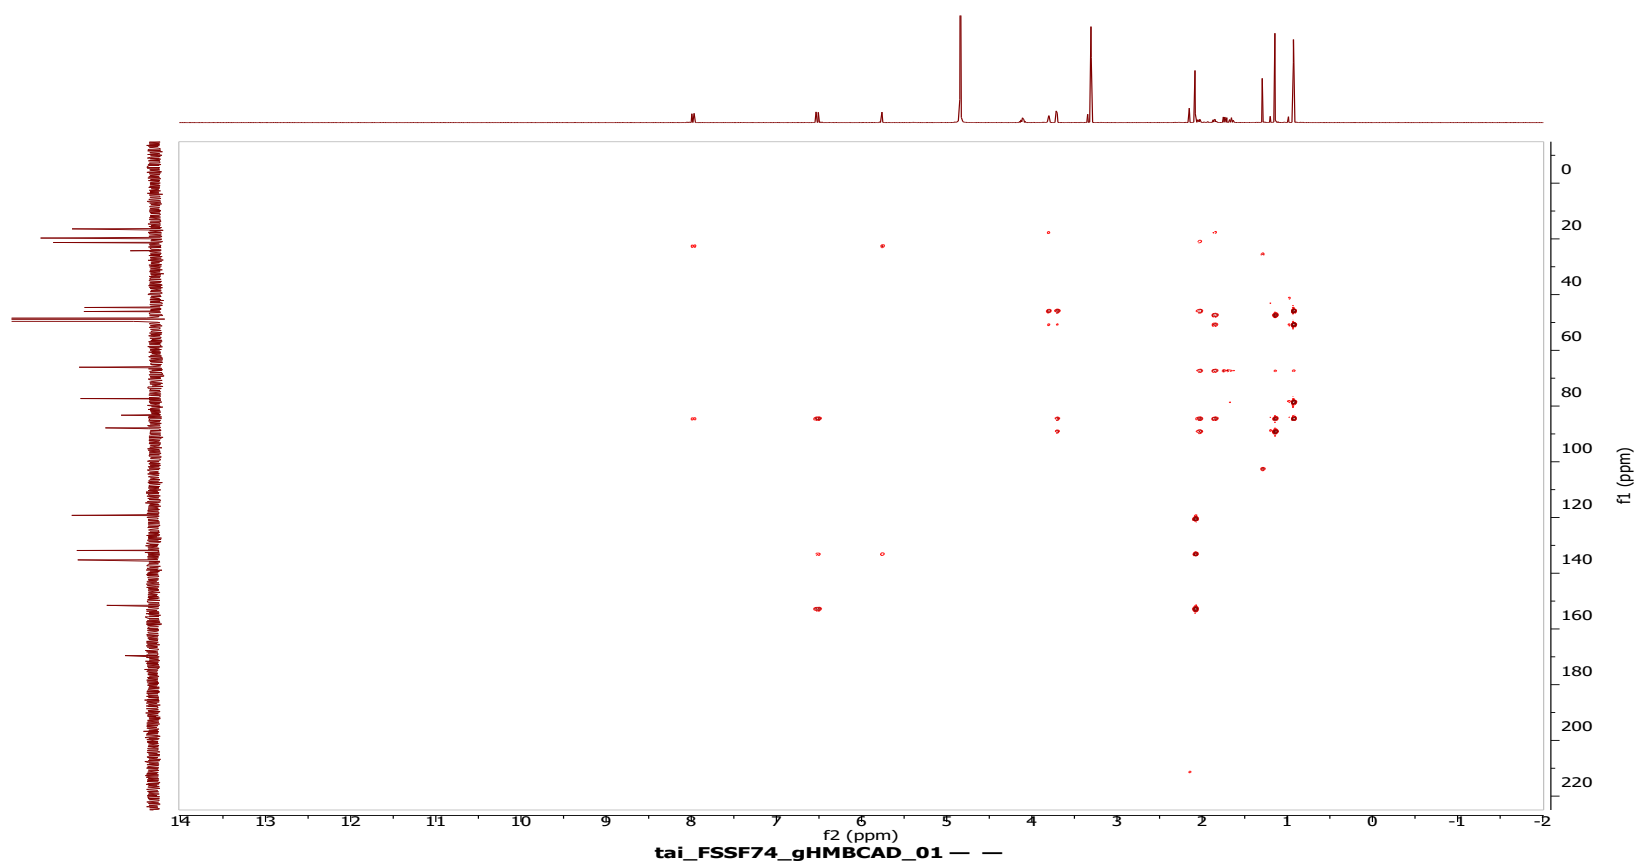

Figure S-40. HMBC spectrum of compound 7

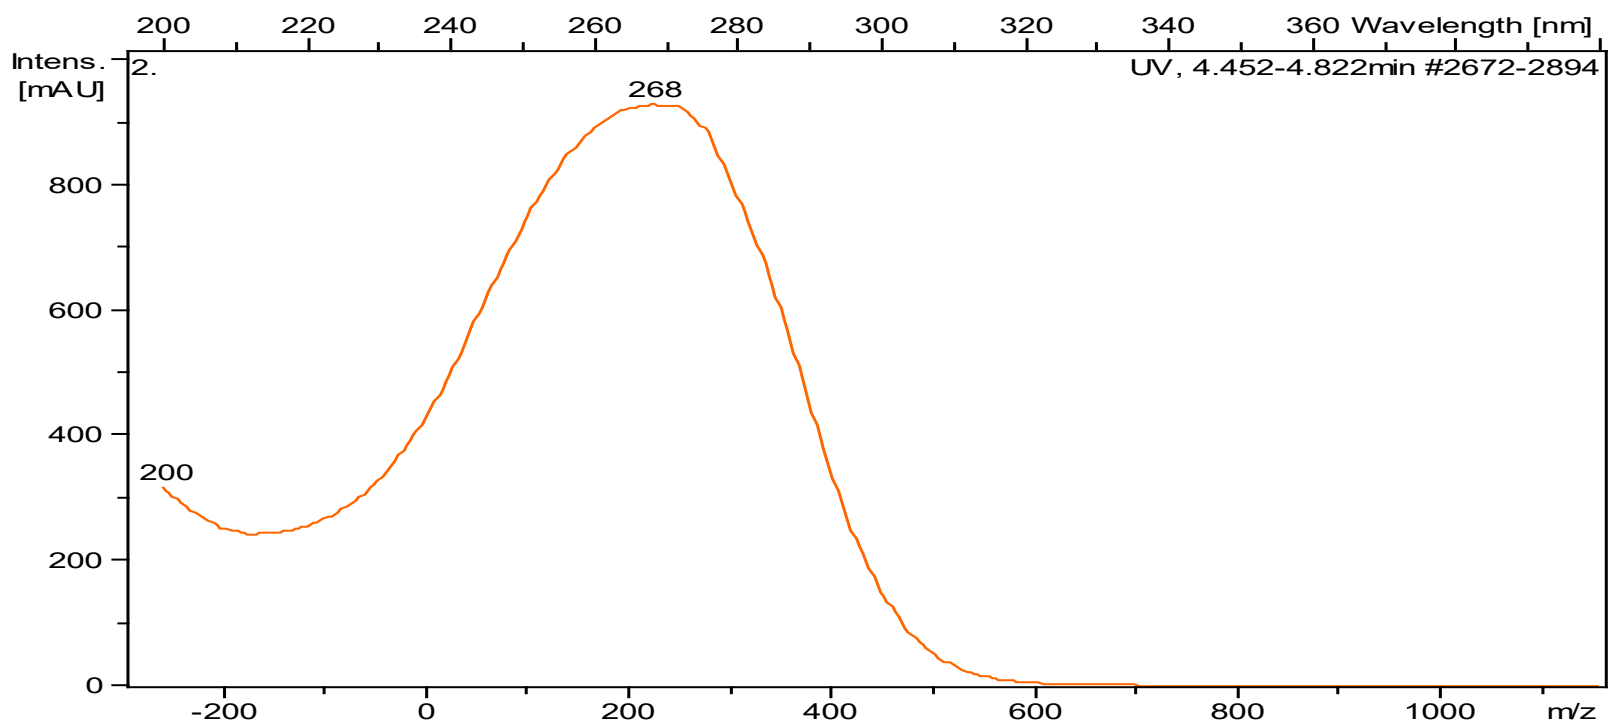

Figure S-41. LC-UV spectrum of compound 7

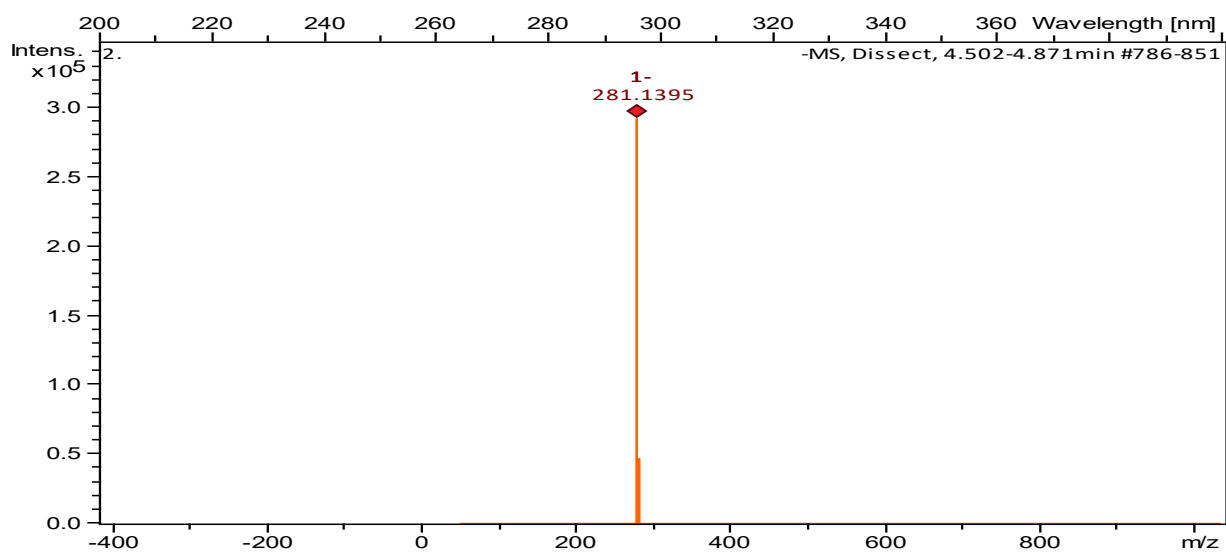

**Figure S-42.** HR-ESIMS spectrum of compound **7**
